# Supplementary material for: Facile synthesis of azaarene-2-substituted chromanone derivatives via tandem sp3C–H functionalization/decarboxylation of azaarenes with 4-oxo-4H-chromene-3-carboxylic acid
Source: Royal Society of Chemistry journal article supplement (doi:10.1039/c4ra09338k), 2014-01-01

# Facile synthesis of azaarene-2-substituted chromanone derivatives via tandem sp<sup>3</sup> C–H functionlization/ decarboxylation of azaarenes with 4-oxo-4H-chromene-3-carboxylic acid

Zhuzhou Shao, Liang Wang, Lubin Xu, Huaili Zhao and Jian Xiao\*

*College of Chemistry and Pharmaceutical Sciences, Qingdao Agricultural University,  
Qingdao, 266109, China*  
[chemjianxiao@gmail.com](mailto:chemjianxiao@gmail.com)

## Supporting Information

### CONTENTS

|                                                         |   |
|---------------------------------------------------------|---|
| 1. General Information.....                             | 2 |
| 2. Experimental Procedures .....                        | 2 |
| 3. Characterization of Products.....                    | 2 |
| 4. <sup>1</sup> H- and <sup>13</sup> C-NMR Spectra..... | 9 |

## 1. General Methods

All the chemical reagents were purchased from commercial companies and all the solvents were dried according to standard procedures before use. All reactions were performed in pressure-proof pipe and monitored by TLC with 0.2 mm silica gel-coated HSGF 254 plates. The reaction mixtures were purified by flash column chromatography (200-300 mesh silica gel) eluted with the gradient of petroleum ether and ethyl acetate.

Proton nuclear magnetic resonance spectra ( $^1\text{H}$  NMR) were recorded on a Bruker AMX 500 spectrophotometer ( $\text{CDCl}_3$  as solvent). Chemical shifts were reported in ppm using tetramethylsilane (TMS,  $\delta$  (ppm) = 0.00 ppm) as the internal standard, and relative to the signal of chloroform-d ( $\delta$  7.26, singlet). The number of protons ( $n$ ) for a given resonance is indicated by  $n\text{H}$ . Coupling constants are reported as a  $J$  value in Hz. The following abbreviations are used to indicate the multiplicity: singlet (s), doublet (d), triplet (t), quartet (q), doublet of doublets (dd), and multiplet (m). Carbon nuclear magnetic resonance spectra ( $^{13}\text{C}$  NMR) were reported in parts per million using solvent  $\text{CDCl}_3$  ( $\delta$  (ppm) = 77.0 ppm) as an internal standard. HRMS analyses were performed on a Waters XEVO QTOF mass spectrometer. The compounds chromone-3-carbaldehyde<sup>1,2</sup>, chromone-3-carboxylic acid<sup>3</sup> and 3-acetyl-chromone<sup>4</sup> were prepared according the reported procedures.

## 2. Experimental Procedures

### General Procedure for Synthesis of Azaarenes-Substituted Chromanones

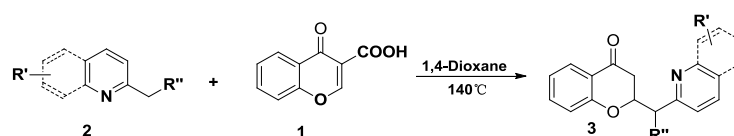

To a 25 mL pressure tube equipped with a magnetic stirrer bar were added dioxane (1 mL), azaarenes **2** (0.75 mmol) and chromanone-3-carboxylic acids **1** (0.3 mmol). The mixture was then stirred at 140 °C and monitored by TLC until **1** was consumed up. Then the reaction was cooled to room temperature and the solvent was removed *in vacuo*. The residue was purified by column chromatography on silica gel to afford the desired product **3**.

## 3. Characterization of Products

### 3.1 2-((6-Methylpyridin-2-yl) methyl) chroman-4-one

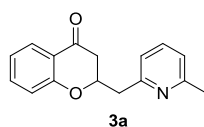

Red-brown solid, yield 67%.

$^1\text{H}$  NMR (500 MHz,  $\text{CDCl}_3$ )  $\delta$  7.87 (dd,  $J$  = 7.8, 1.0 Hz, 1H), 7.53 (t,  $J$  = 7.7 Hz, 1H), 7.48-7.42 (m, 1H), 7.08-7.02 (m, 2H), 7.00 (t,  $J$  = 7.5 Hz, 1H), 6.93 (d,  $J$  = 8.3 Hz, 1H), 4.97-4.89 (m, 1H), 3.36 (dd,  $J$  = 13.8, 7.0 Hz, 1H), 3.15 (dd,  $J$  = 13.8, 6.1 Hz, 1H), 2.76 (d,  $J$  = 7.7 Hz, 2H), 2.53 (s, 3H).  $^{13}\text{C}$  NMR (125 MHz,  $\text{CDCl}_3$ )  $\delta$  192.2, 161.4, 158.2, 155.8, 136.7,

135.9, 126.9, 121.5, 121.2, 121.1, 121.0, 117.9, 77.4, 43.4, 42.5, 24.3. **HRMS (ESI):** calcd. for C<sub>16</sub>H<sub>16</sub>NO<sub>2</sub> [M+H]<sup>+</sup>: 254.1176, found: 254.1176.

### 3.2 2-((6-Methyl-5-nitropyridin-2-yl)methyl)chroman-4-one

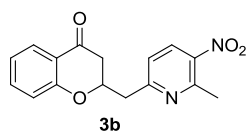

Brown solid, yield 56%.

**<sup>1</sup>H NMR** (500 MHz, CDCl<sub>3</sub>) δ 8.27 (d, *J* = 8.4 Hz, 1H), 7.89 (dd, *J* = 7.9, 1.6 Hz, 1H), 7.49-7.44 (m, 1H), 7.32 (d, *J* = 8.4 Hz, 1H), 7.02 (t, *J* = 7.5 Hz, 1H), 6.89 (d, *J* = 8.4 Hz, 1H), 5.05-4.97 (m, 1H), 3.41 (dd, *J* = 14.1, 7.7 Hz, 1H), 3.25 (dd, *J* = 14.1, 5.0 Hz, 1H), 2.85 (s, 3H), 2.84-2.80 (m, 2H). **<sup>13</sup>C NMR** (125 MHz, CDCl<sub>3</sub>) δ 191.6, 161.1, 161.0, 153.7, 144.3, 136.1, 132.9, 127.0, 122.4, 121.6, 120.9, 117.8, 76.6, 43.2, 42.6, 24.0. **HRMS (ESI):** calcd. for C<sub>16</sub>H<sub>15</sub>N<sub>2</sub>O<sub>4</sub> [M+H]<sup>+</sup>: 299.1027, found: 299.1025.

### 3.3 2-(pyridin-2-ylmethyl)chroman-4-one

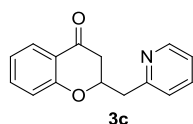

Brown viscous liquid, 70%.

**<sup>1</sup>H NMR** (500 MHz, CDCl<sub>3</sub>) δ 8.56 (d, *J* = 3.9 Hz, 1H), 7.87 (d, *J* = 7.9 Hz, 1H), 7.66 (t, *J* = 7.7 Hz, 1H), 7.45 (t, *J* = 7.7 Hz, 1H), 7.29-7.26 (m, 1H), 7.22-7.16 (m, 1H), 7.00 (t, *J* = 7.5 Hz, 1H), 6.93 (d, *J* = 8.3 Hz, 1H), 5.00-4.91 (m, 1H), 3.39 (dd, *J* = 13.9, 6.9 Hz, 1H), 3.20 (dd, *J* = 13.9, 5.9 Hz, 1H), 2.77 (dd, *J* = 6.9, 1.6 Hz, 2H). **<sup>13</sup>C NMR** (125 MHz, CDCl<sub>3</sub>) δ 192.2, 161.4, 156.7, 149.6, 136.6, 136.0, 127.0, 124.3, 122.0, 121.4, 121.1, 118.0, 77.4, 43.4, 42.6. **HRMS (ESI):** calcd. for C<sub>15</sub>H<sub>14</sub>NO<sub>2</sub> [M+H]<sup>+</sup>: 240.1020, found: 240.1020.

### 3.4 2-(1-(pyridin-2-yl)ethyl)chroman-4-one

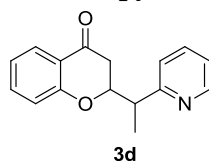

Brown viscous liquid, 37%.

**<sup>1</sup>H NMR** (500 MHz, CDCl<sub>3</sub>) δ 8.57 (d, *J* = 4.3 Hz, 1H), 7.85 (dd, *J* = 7.9, 1.1 Hz, 1H), 7.69-7.62 (m, 1H), 7.45-7.38 (m, 1H), 7.28-7.25 (m, 1H), 7.18 (dd, *J* = 7.0, 5.2 Hz, 1H), 6.98 (t, *J* = 7.5 Hz, 1H), 6.85 (d, *J* = 8.3 Hz, 1H), 4.88-4.77 (m, 1H), 3.44-3.37 (p, *J* = 7.0 Hz, 1H), 2.75 (dd, *J* = 9.8, 8.1 Hz, 2H), 1.45 (d, *J* = 7.1 Hz, 3H). **<sup>13</sup>C NMR** (125 MHz, CDCl<sub>3</sub>) δ 192.5, 161.5, 161.4, 149.2, 136.4, 135.8, 126.9, 123.0, 121.9, 121.2, 121.0, 117.9, 80.8, 45.6, 40.1, 15.3. **HRMS (ESI):** calcd. for C<sub>16</sub>H<sub>16</sub>NO<sub>2</sub> [M+H]<sup>+</sup>: 254.1176, found: 254.1175.

### 3.5 2-((3-methylpyridin-2-yl)methyl)chroman-4-one

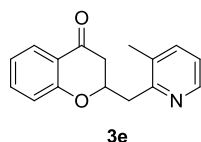

Brown viscous liquid, 57%.

**<sup>1</sup>H NMR** (500 MHz, CDCl<sub>3</sub>) δ 8.39 (d, *J* = 3.8 Hz, 1H), 7.88 (dd, *J* = 7.8, 1.2 Hz, 1H), 7.50 – 7.41 (m, 2H), 7.10 (dd, *J* = 7.4, 4.9 Hz, 1H), 7.00 (t, *J* = 7.5 Hz, 1H), 6.91 (d, *J* = 8.4 Hz, 1H), 5.08-5.00 (m, 1H), 3.44 (dd, *J* = 14.2, 6.6 Hz, 1H), 3.19 (dd, *J* = 14.2, 6.6 Hz, 1H), 2.88-2.75 (m, 2H), 2.37 (s, 3H). **<sup>13</sup>C NMR** (125 MHz, CDCl<sub>3</sub>) δ 192.3, 161.5, 155.2, 146.8, 137.9, 135.9, 132.1, 127.0, 121.9, 121.2, 121.1, 117.9, 77.5, 42.7, 40.0, 19.0. **HRMS (ESI):** calcd. for C<sub>16</sub>H<sub>16</sub>NO<sub>2</sub> [M+H]<sup>+</sup>:254.1176, found: 254.1176.

### 3.6 2-(Pyrimidin-4-ylmethyl)chroman-4-one

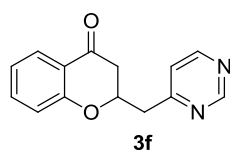

Brown viscous liquid, 41%.

**<sup>1</sup>H NMR** (500 MHz, CDCl<sub>3</sub>) δ 9.17 (s, 1H), 8.70 (d, *J* = 5.0 Hz, 1H), 7.88 (d, *J* = 7.8 Hz, 1H), 7.49-7.43 (m, 1H), 7.33 (d, *J* = 5.0 Hz, 1H), 7.02 (t, *J* = 7.5 Hz, 1H), 6.90 (d, *J* = 8.3 Hz, 1H), 5.05-4.97 (m, 1H), 3.33 (dd, *J* = 14.3, 7.8 Hz, 1H), 3.18 (dd, *J* = 14.3, 5.0 Hz, 1H), 2.84-2.78 (m, 2H). **<sup>13</sup>C NMR** (125 MHz, CDCl<sub>3</sub>) δ 191.4, 165.4, 160.9, 158.8, 156.9, 136.1, 127.0, 121.8, 121.6, 120.9, 117.8, 76.2, 42.7, 42.6. **HRMS (ESI):** calcd. for C<sub>14</sub>H<sub>13</sub>N<sub>2</sub>O<sub>2</sub> [M+H]<sup>+</sup>: 241.0972, found: 241.0972.

### 3.7 2-(Pyrazin-2-ylmethyl)chroman-4-one

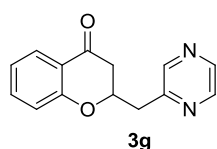

Brown viscous liquid, 25%.

**<sup>1</sup>H NMR** (500 MHz, CDCl<sub>3</sub>) δ 8.60 (s, 1H), 8.54 (s, 1H), 8.49 (d, *J* = 2.3 Hz, 1H), 7.88 (dd, *J* = 7.9, 1.5 Hz, 1H), 7.48-7.43 (m, 1H), 7.02 (t, *J* = 7.5 Hz, 1H), 6.91 (d, *J* = 8.3 Hz, 1H), 4.99-4.89 (m, 1H), 3.38 (dd, *J* = 14.3, 7.6 Hz, 1H), 3.23 (dd, *J* = 14.3, 5.0 Hz, 1H), 2.83-2.79 (m, 2H). **<sup>13</sup>C NMR** (125 MHz, CDCl<sub>3</sub>) δ 191.6, 161.1, 152.7, 145.6, 144.2, 143.1, 136.1, 127.0, 121.6, 120.9, 117.9, 76.6, 42.6, 40.6. **HRMS (ESI):** calcd. for C<sub>14</sub>H<sub>13</sub>N<sub>2</sub>O<sub>2</sub> [M+H]<sup>+</sup>: 241.0972, found: 241.0973.

### 3.8 2-(Quinolin-2-ylmethyl)chroman-4-one

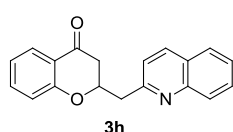

Brown liquid, yield 53%.

**<sup>1</sup>H NMR** (500 MHz, CDCl<sub>3</sub>) δ 8.13 (d, *J* = 8.4 Hz, 1H), 8.04 (d, *J* = 8.5 Hz, 1H), 7.88 (dd, *J* = 7.8, 1.5 Hz, 1H), 7.81 (d, *J* = 8.0 Hz, 1H), 7.74-7.68 (m, 1H), 7.52 (t, *J* = 7.4 Hz, 1H), 7.46-7.37 (m, 2H), 6.99 (t, *J* = 7.5 Hz, 1H), 6.92 (d, *J* = 8.3 Hz, 1H), 5.12-5.04 (m, 1H), 3.56 (dd, *J* = 14.0, 7.1 Hz, 1H), 3.39 (dd, *J* = 14.0, 5.8 Hz, 1H), 2.87-2.82 (m, 2H). **<sup>13</sup>C NMR** (125 MHz, CDCl<sub>3</sub>) δ 192.0, 161.3, 157.2, 147.9, 136.5, 135.9, 129.6, 128.9, 127.5, 126.9, 126.2, 125.8, 122.2, 121.3, 121.0, 117.9, 77.4, 44.0, 42.6. **HRMS (ESI)**: calcd. for C<sub>19</sub>H<sub>16</sub>NO<sub>2</sub> [M+H]<sup>+</sup>: 290.1176, found: 290.1170.

### 3.9 2-((6-Methylquinolin-2-yl)methyl)chroman-4-one

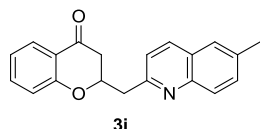

Brown liquid, yield 45%.

**<sup>1</sup>H NMR** (500 MHz, CDCl<sub>3</sub>) δ 8.02 (d, *J* = 8.4 Hz, 1H), 7.92 (d, *J* = 8.5 Hz, 1H), 7.87 (dd, *J* = 7.8, 1.4 Hz, 1H), 7.58-7.50 (m, 2H), 7.46-7.40 (m, 1H), 7.34 (d, *J* = 8.3 Hz, 1H), 6.98 (t, *J* = 7.5 Hz, 1H), 6.91 (d, *J* = 8.4 Hz, 1H), 5.09-5.01 (m, 1H), 3.53 (dd, *J* = 14.0, 7.1 Hz, 1H), 3.35 (dd, *J* = 13.9, 5.9 Hz, 1H), 2.84-2.80 (m, 2H), 2.52 (s, 3H). **<sup>13</sup>C NMR** (125 MHz, CDCl<sub>3</sub>) δ 192.1, 161.3, 156.2, 146.5, 136.0, 135.9, 135.7, 131.8, 128.5, 126.9, 126.9, 126.3, 122.2, 121.3, 121.0, 117.9, 77.4, 43.9, 42.6, 21.4. **HRMS (ESI)**: calcd. for C<sub>20</sub>H<sub>18</sub>NO<sub>2</sub> [M+H]<sup>+</sup>: 304.1333, found: 304.1327.

### 3.10 2-((6-Bromoquinolin-2-yl)methyl)chroman-4-one

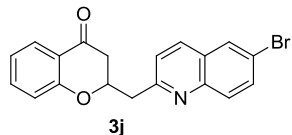

Brown liquid, yield 43%.

**<sup>1</sup>H NMR** (500 MHz, CDCl<sub>3</sub>) δ 8.04 (d, *J* = 8.4 Hz, 1H), 7.97 (d, *J* = 1.9 Hz, 1H), 7.92-7.87 (m, 2H), 7.77 (dd, *J* = 9.0, 2.0 Hz, 1H), 7.48-7.39 (m, 2H), 7.01 (t, *J* = 7.5 Hz, 1H), 6.92 (d, *J* = 8.4 Hz, 1H), 5.12-5.04 (m, 1H), 3.55 (dd, *J* = 14.1, 7.2 Hz, 1H), 3.38 (dd, *J* = 14.1, 5.7 Hz, 1H), 2.87-2.83 (m, 2H). **<sup>13</sup>C NMR** (125 MHz, CDCl<sub>3</sub>) δ 191.9, 161.2, 157.8, 146.4, 135.9, 135.3, 133.0, 130.6, 129.5, 128.0, 126.9, 123.1, 121.4, 121.0, 120.0, 117.9, 77.1, 43.9, 42.6. **HRMS (ESI)**: calcd. for C<sub>19</sub>H<sub>15</sub>BrNO<sub>2</sub> [M+H]<sup>+</sup>: 368.0281, found: 368.0275. C<sub>19</sub>H<sub>15</sub><sup>81</sup>BrNO<sub>2</sub> [M+H+2]<sup>+</sup>: 370.0261, found: 370.0260.

### 3.11 2-((7-chloroquinolin-2-yl)methyl)chroman-4-one

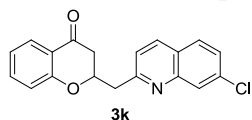

Brown liquid, yield 39%.

**<sup>1</sup>H NMR** (500 MHz, CDCl<sub>3</sub>) δ 8.22 (dd, *J* = 8.0, 1.6 Hz, 1H), 7.92-7.85 (m, 2H), 7.75 (d, *J* = 8.7 Hz, 1H), 7.46-7.38 (m, 3H), 7.01 (t, *J* = 7.5 Hz, 1H), 6.91 (d, *J* = 8.4 Hz, 1H), 5.19-4.98 (m, 1H), 3.55 (dd, *J* = 14.1, 7.2 Hz, 1H), 3.39 (dd, *J* = 14.1, 5.7 Hz, 1H), 2.90-2.77 (m, 2H).

$^{13}\text{C}$  NMR (125 MHz,  $\text{CDCl}_3$ )  $\delta$  192.0, 161.3, 158.5, 148.2, 136.0, 135.5, 133.8, 128.7, 127.0, 125.3, 125.24, 122.5, 121.4, 121.0, 118.2, 117.9, 77.2, 43.9, 42.6. **HRMS (ESI):** calcd. for  $\text{C}_{19}\text{H}_{15}\text{ClNO}_2$   $[\text{M}+\text{H}]^+$ : 324.0786, found: 324.0781.  $\text{C}_{19}\text{H}_{15}^{37}\text{ClNO}_2$   $[\text{M}+\text{H}+2]^+$ : 326.0757, found: 326.0458.

### 3.12 2-((8-hydroxyquinolin-2-yl)methyl)chroman-4-one

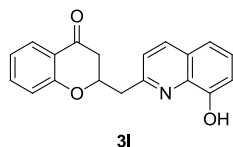

Brown liquid, yield 48%.

$^1\text{H}$  NMR (500 MHz,  $\text{CDCl}_3$ )  $\delta$  8.10 (d,  $J = 8.3$  Hz, 1H), 7.87 (d,  $J = 7.8$  Hz, 1H), 7.47-7.36 (m, 3H), 7.31 (d,  $J = 8.2$  Hz, 1H), 7.16 (d,  $J = 7.6$  Hz, 1H), 6.99 (t,  $J = 7.4$  Hz, 1H), 6.90 (d,  $J = 8.3$  Hz, 1H), 5.11-5.02 (m, 1H), 3.53 (dd,  $J = 14.1, 7.2$  Hz, 1H), 3.36 (dd,  $J = 14.1, 5.6$  Hz, 1H), 2.80 (d,  $J = 7.7$  Hz, 2H).  $^{13}\text{C}$  NMR (125 MHz,  $\text{CDCl}_3$ )  $\delta$  191.7, 161.2, 155.1, 151.7, 137.7, 136.6, 136.0, 127.4, 127.1, 126.9, 122.9, 121.4, 121.0, 117.9, 117.6, 110.2, 77.1, 43.4, 42.5. **HRMS (ESI):** calcd. for  $\text{C}_{19}\text{H}_{16}\text{NO}_3$   $[\text{M}+\text{H}]^+$ : 306.1125, found: 306.1129.

### 3.13 2-((8-methoxyquinolin-2-yl)methyl)chroman-4-one

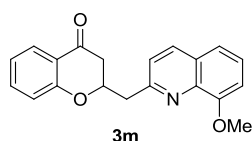

Brown liquid, yield 67%.

$^1\text{H}$  NMR (500 MHz,  $\text{CDCl}_3$ )  $\delta$  8.11 (d,  $J = 8.4$  Hz, 1H), 7.88 (d,  $J = 6.6$  Hz, 1H), 7.49-7.42 (m, 3H), 7.39 (d,  $J = 8.0$  Hz, 1H), 7.07 (d,  $J = 7.5$  Hz, 1H), 7.00 (t,  $J = 7.4$  Hz, 1H), 6.92 (d,  $J = 8.3$  Hz, 1H), 5.11-5.03 (m, 1H), 4.08 (s, 3H), 3.62 (dd,  $J = 13.9, 7.5$  Hz, 1H), 3.47 (dd,  $J = 13.9, 5.4$  Hz, 1H), 2.84 (d,  $J = 7.7$  Hz, 2H).  $^{13}\text{C}$  NMR (125 MHz,  $\text{CDCl}_3$ )  $\delta$  192.1, 161.4, 156.4, 155.1, 140.0, 136.3, 135.9, 128.2, 127.0, 126.4, 122.9, 121.3, 121.1, 119.5, 118.0, 108.0, 77.7, 56.1, 44.2, 42.7. **HRMS (ESI):** calcd. for  $\text{C}_{20}\text{H}_{18}\text{NO}_3$   $[\text{M}+\text{H}]^+$ : 320.1282, found: 320.1280.

### 3.14 2-((8-(benzyloxy)quinolin-2-yl)methyl)chroman-4-one

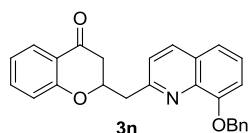

Brown liquid, yield 71%.

$^1\text{H}$  NMR (500 MHz,  $\text{CDCl}_3$ )  $\delta$  8.08 (d,  $J = 8.3$  Hz, 1H), 7.89 (d,  $J = 7.6$  Hz, 1H), 7.49 (d,  $J = 7.4$  Hz, 2H), 7.43 (t,  $J = 6.8$  Hz, 2H), 7.37-7.31 (m, 4H), 7.30-7.26 (m, 1H), 7.07 (d,  $J = 7.0$  Hz, 1H), 7.02-6.97 (m, 1H), 6.92 (d,  $J = 8.3$  Hz, 1H), 5.40 (s, 2H), 5.16-5.07 (m, 1H), 3.61 (dd,  $J = 14.1, 7.1$  Hz, 1H), 3.47 (dd,  $J = 14.1, 5.7$  Hz, 1H), 2.91-2.83 (m, 2H).  $^{13}\text{C}$  NMR (125 MHz,  $\text{CDCl}_3$ )  $\delta$  192.1, 161.4, 156.3, 154.1, 140.3, 137.1, 136.3, 135.9, 129.0, 128.7, 128.5, 127.7, 126.9, 126.2, 122.8, 121.3, 121.1, 119.9, 117.9, 111.0, 77.5, 71.0, 43.9, 42.6. **HRMS**

(ESI): calcd. for C<sub>26</sub>H<sub>22</sub>NO<sub>3</sub> [M+H]<sup>+</sup>: 396.1595, found: 396.1596.

### 3.15 2-(benzo[f]quinolin-3-ylmethyl)chroman-4-one

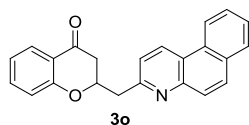

Brown liquid, yield 59%.

<sup>1</sup>H NMR (500 MHz, CDCl<sub>3</sub>) δ 8.90 (d, *J* = 8.4 Hz, 1H), 8.60 (d, *J* = 8.1 Hz, 1H), 8.05-7.85 (m, 4H), 7.72-7.57 (m, 2H), 7.54 (d, *J* = 8.4 Hz, 1H), 7.43 (t, *J* = 7.5 Hz, 1H), 6.99 (t, *J* = 7.5 Hz, 1H), 6.92 (d, *J* = 8.3 Hz, 1H), 5.18-5.06 (m, 1H), 3.59 (dd, *J* = 14.0, 7.1 Hz, 1H), 3.43 (dd, *J* = Hz, 1H), 2.92-2.75 (m, 2H). <sup>13</sup>C NMR (125 MHz, CDCl<sub>3</sub>) δ 192.1, 161.4, 156.7, 147.9, 135.9, 131.5, 131.2, 131.0, 129.5, 128.7, 127.8, 127.1, 126.9, 126.8, 124.0, 122.5, 122.2, 121.3, 121.09, 117.9, 77.4, 43.7, 42.7. HRMS (ESI): calcd. for C<sub>23</sub>H<sub>17</sub>NO<sub>2</sub> [M+H]<sup>+</sup>: 339.1254, found: 339.1250.

### 3.16 2-(isoquinolin-1-ylmethyl)chroman-4-one

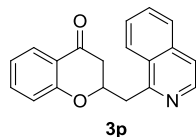

Brown liquid, yield 57%.

<sup>1</sup>H NMR (500 MHz, CDCl<sub>3</sub>) δ 8.46 (d, *J* = 5.6 Hz, 1H), 8.17 (d, *J* = 8.5 Hz, 1H), 7.87 (dd, *J* = 7.9, 1.5 Hz, 1H), 7.84 (d, *J* = 8.2 Hz, 1H), 7.69 (t, *J* = 7.5 Hz, 1H), 7.64-7.58 (m, 1H), 7.57 (d, *J* = 5.7 Hz, 1H), 7.45-7.39 (m, 1H), 6.98 (t, *J* = 7.5 Hz, 1H), 6.88 (d, *J* = 8.3 Hz, 1H), 5.24-5.16 (m, 1H), 3.98 (dd, *J* = 14.5, 6.2 Hz, 1H), 3.66 (dd, *J* = 14.5, 7.0 Hz, 1H), 2.89-2.83 (m, 2H). <sup>13</sup>C NMR (125 MHz, CDCl<sub>3</sub>) δ 192.2, 161.5, 156.6, 141.9, 136.4, 135.9, 130.1, 127.6, 127.5, 127.4, 127.0, 125.1, 121.4, 121.1, 120.1, 118.0, 77.3, 42.9, 40.0. HRMS (ESI): calcd. for C<sub>19</sub>H<sub>16</sub>NO<sub>2</sub> [M+H]<sup>+</sup>: 290.1176, found: 290.1170.

### 3.17 6-methyl-2-(quinolin-2-ylmethyl)chroman-4-one

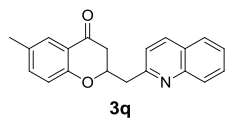

Brown viscous liquid, 51%.

<sup>1</sup>H NMR (500 MHz, CDCl<sub>3</sub>) δ 8.13 (d, *J* = 8.4 Hz, 1H), 8.04 (d, *J* = 8.3 Hz, 1H), 7.82 (d, *J* = 8.4 Hz, 1H), 7.74 - 7.70 (m, 1H), 7.68-7.65 (m, 1H), 7.55 - 7.50 (m, 2H), 7.41 (d, *J* = 8.4 Hz, 1H), 7.26-7.24 (m, 1H), 6.82 (d, *J* = 8.4 Hz, 1H), 5.07-5.0 (m, 1H), 3.55 (dd, *J* = 13.9, 7.2 Hz, 1H), 3.38 (dd, *J* = 13.9, 5.7 Hz, 1H), 2.85 - 2.79 (m, 2H), 2.29 (s, 3H). <sup>13</sup>C NMR (125 MHz, CDCl<sub>3</sub>) δ 192.4, 159.4, 157.4, 147.9, 137.0, 136.5, 130.8, 129.6, 128.9, 127.5, 127.0, 126.5, 126.2, 122.3, 120.6, 117.7, 77.4, 44.1, 42.7, 20.4. HRMS (ESI): calcd. for C<sub>20</sub>H<sub>18</sub>NO<sub>2</sub> [M+H]<sup>+</sup>: 304.1333, found: 304.1337.

## Reference

1. K. M. Khan, N. Ambreen, U. R. Mughal, S. Jalil, S. Perveen, M. I. Choudhary, *Eur. J. Med. Chem.*, 2010, **45**, 4058.
2. H. Xiang, X. Qi, Y. Xie, G. Xu, C. Yang, *Org. Biomol. Chem.*, 2012, **10**, 7730.
3. Y. Machida, S. Nomoto, S. Negi, H. Ikuta, I. Saito, *Synthetic Communications*, 1980, **10**, 889.
4. L. A. Stubbing, F. F. Li, D. P. Furkert, V. E. Caprio, M. A. Brimble, *Tetrahedron*, 2012, **68**, 6948.



#### 4. <sup>1</sup>H- and <sup>13</sup>C-NMR Spectras

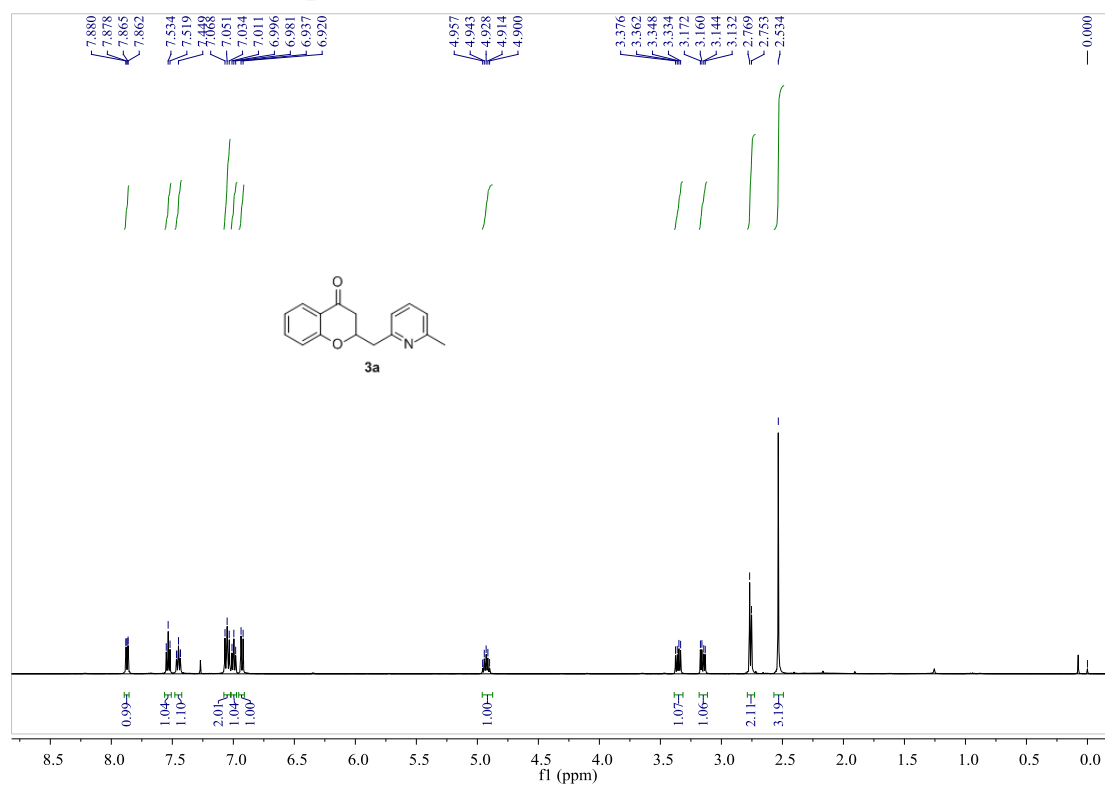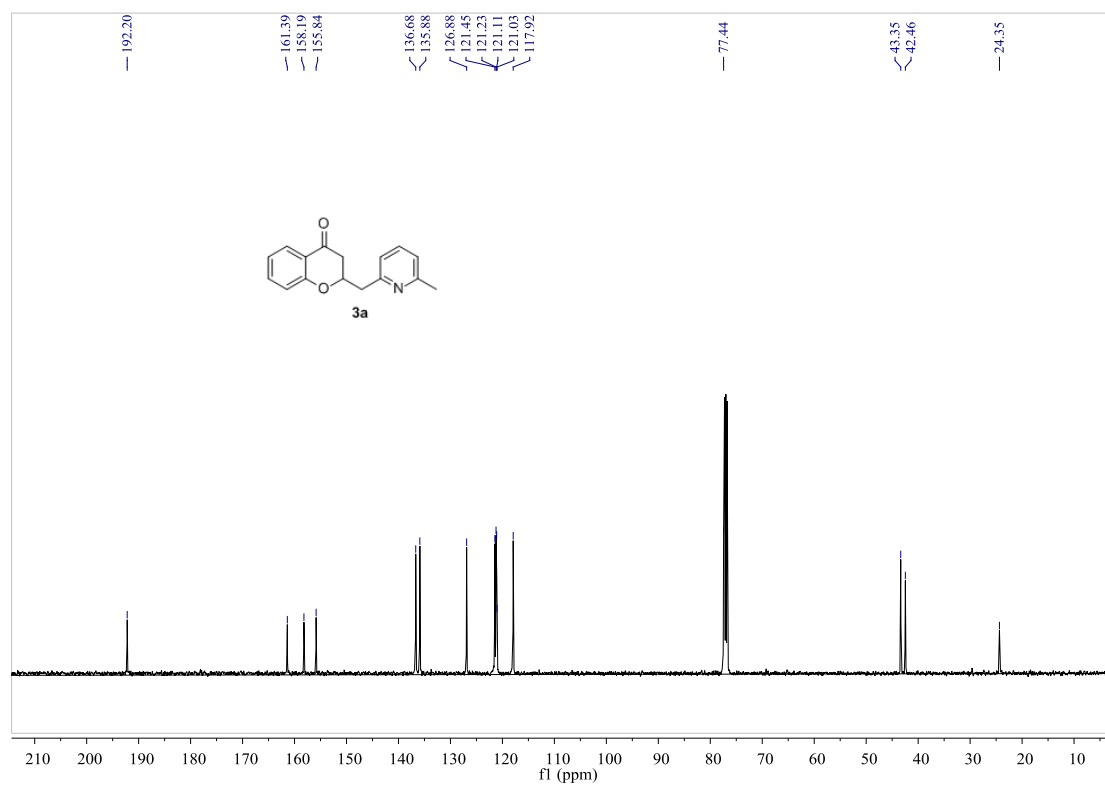

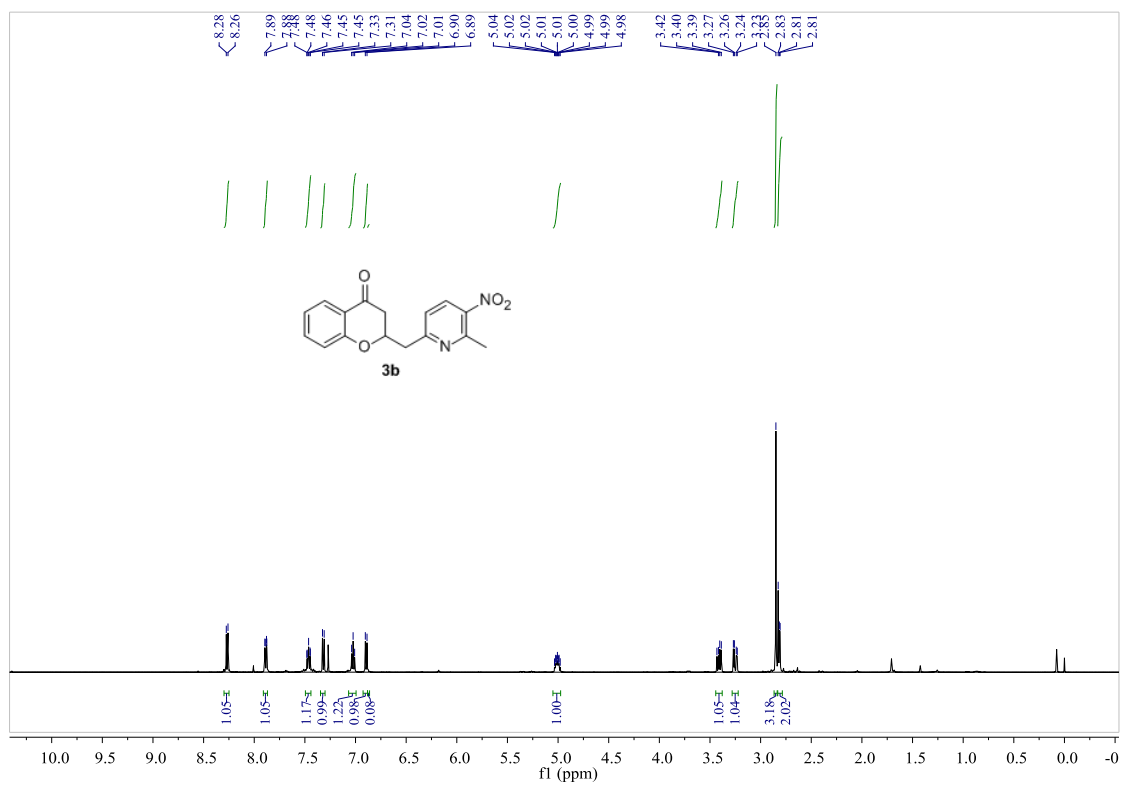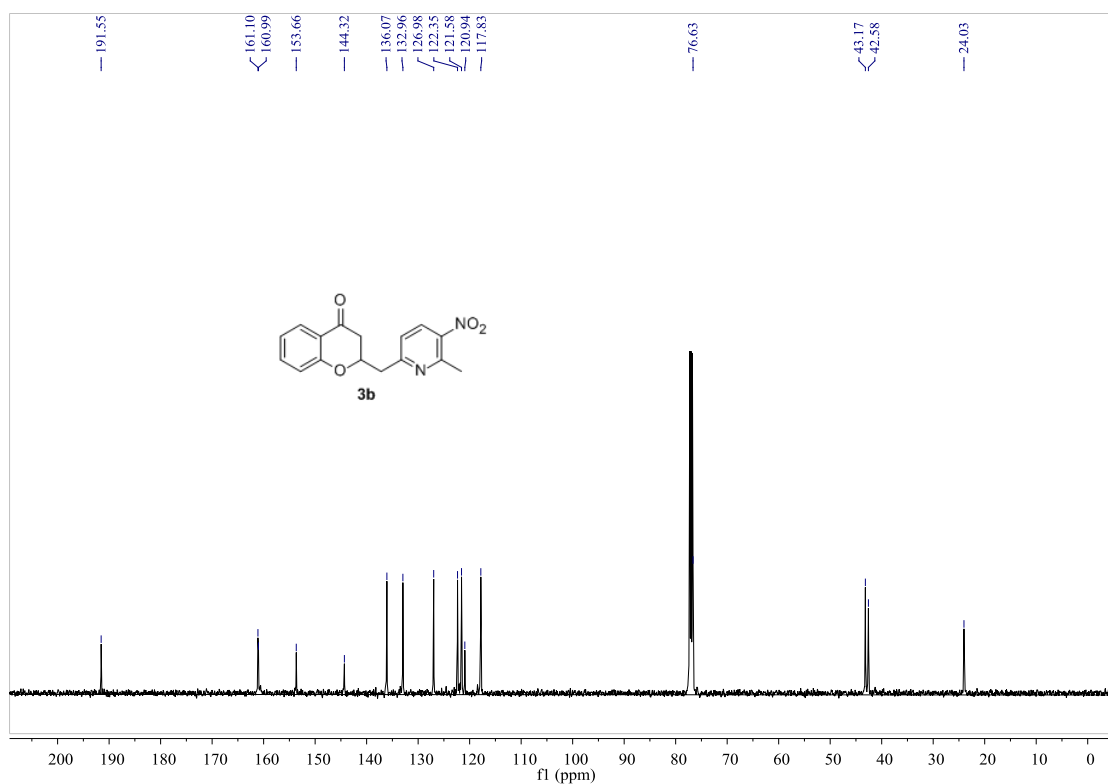

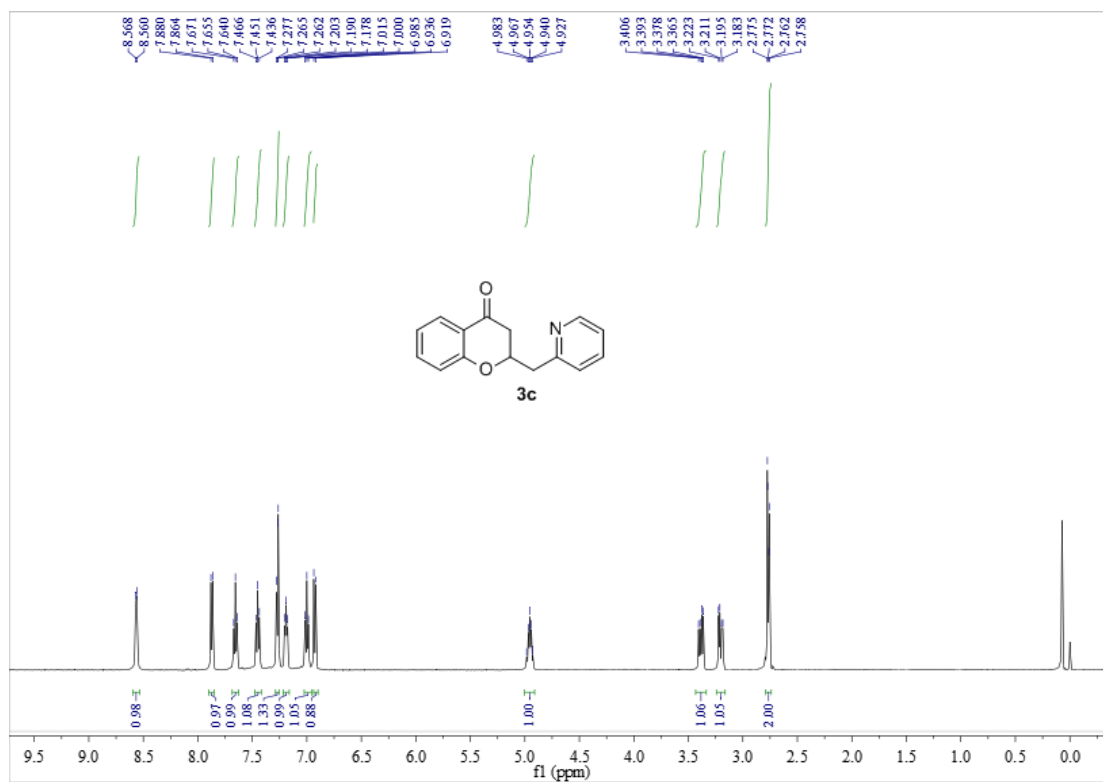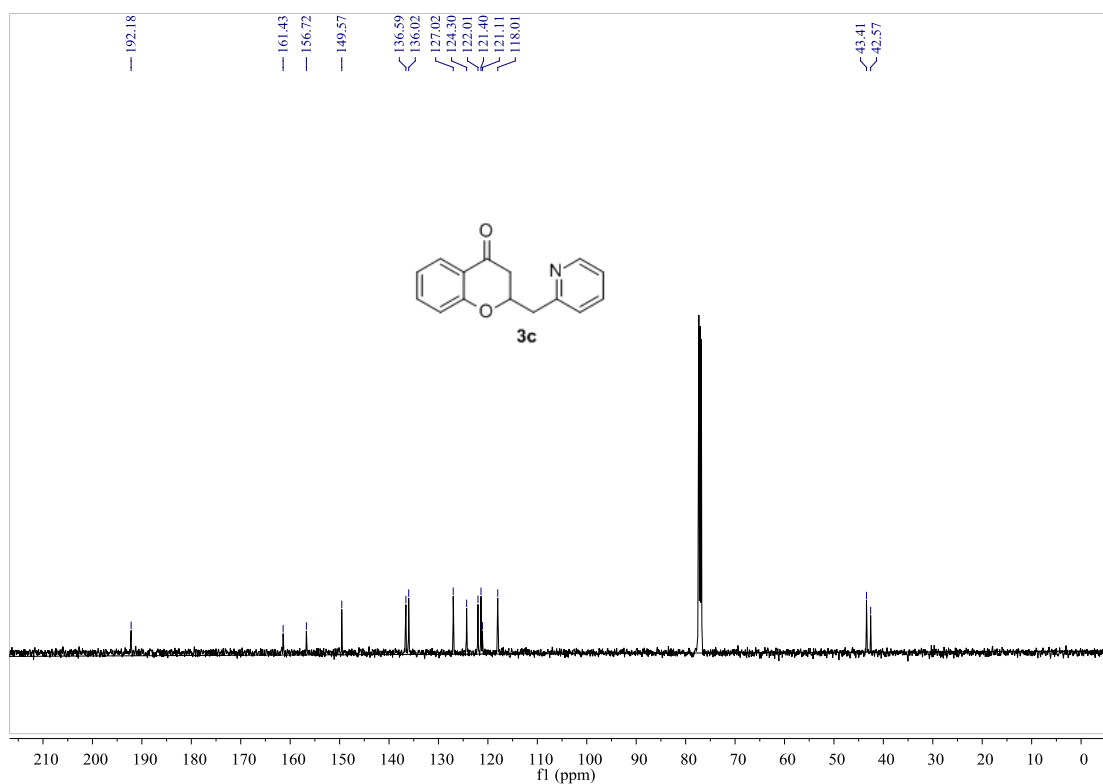

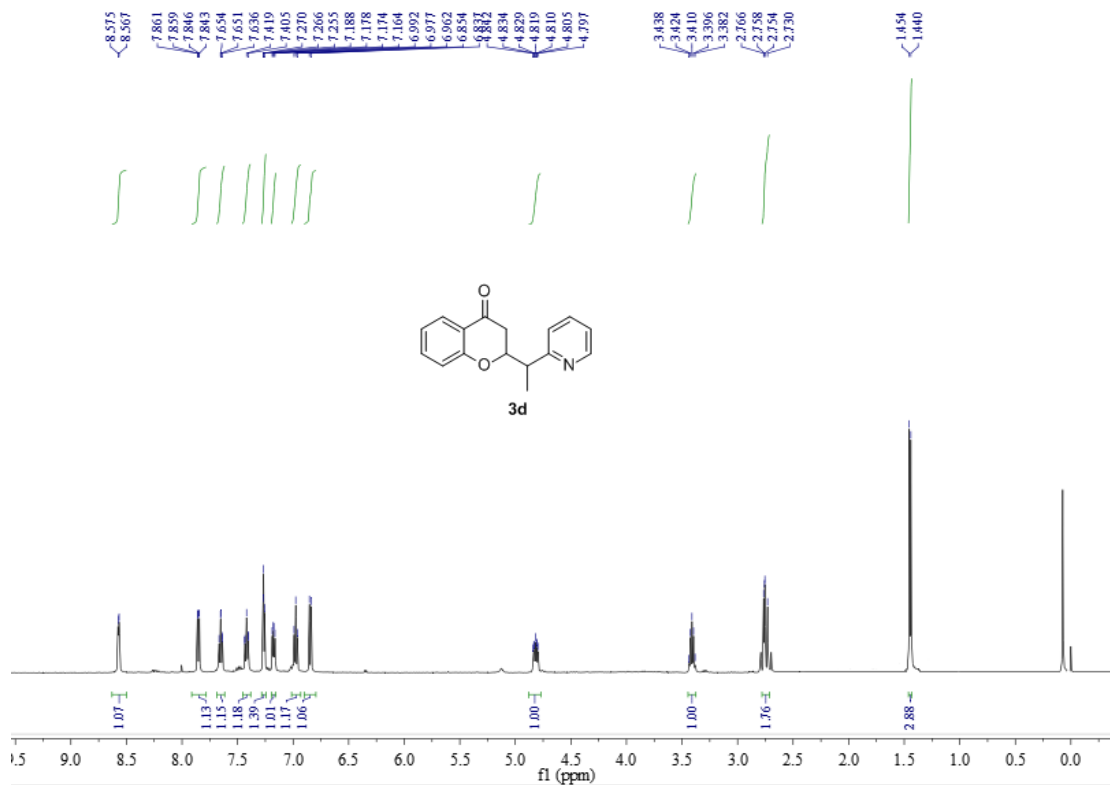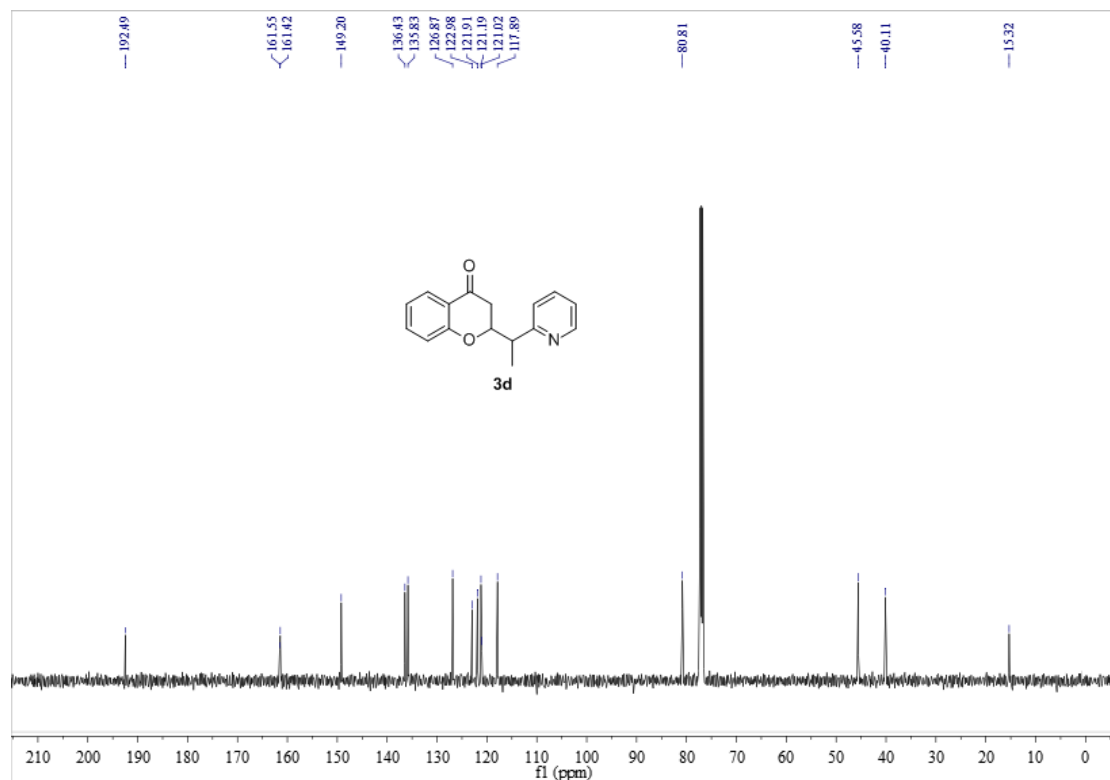

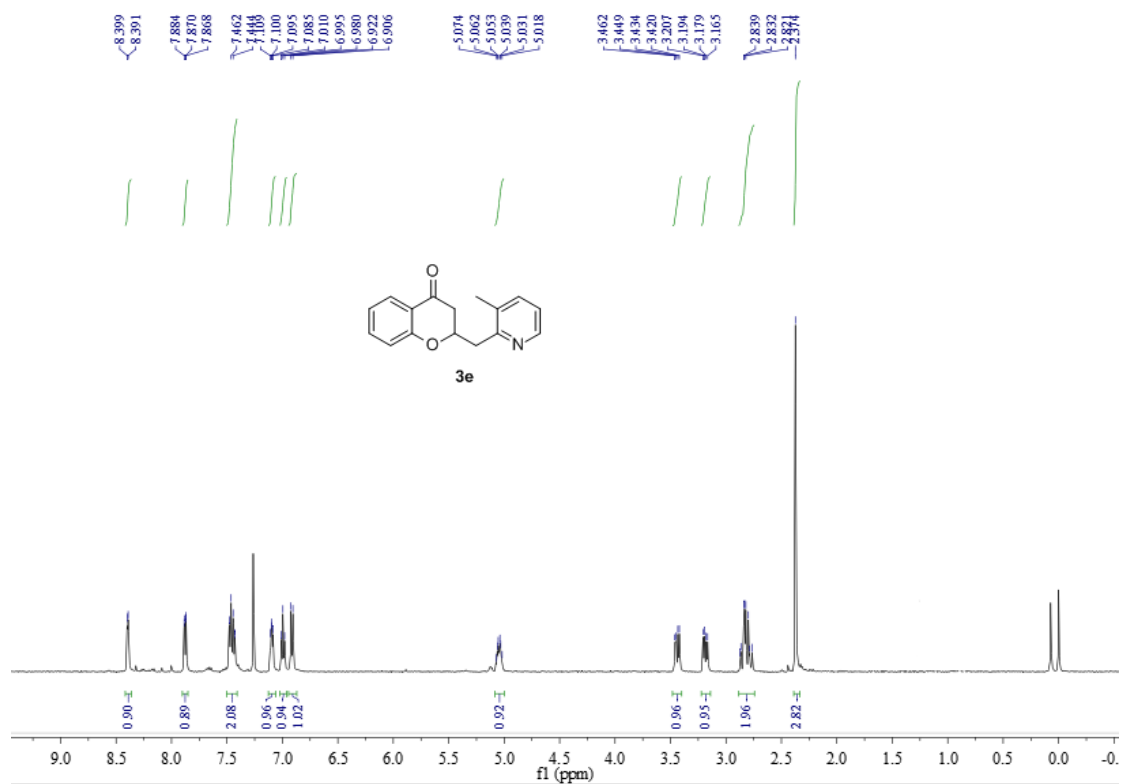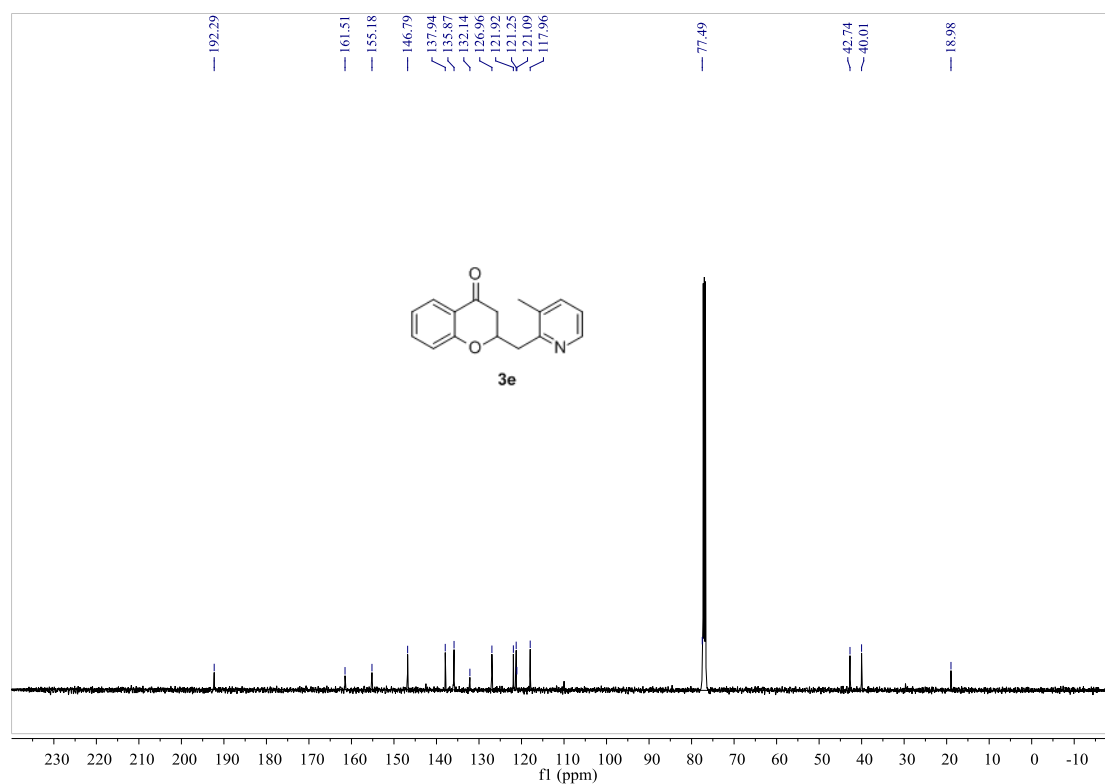

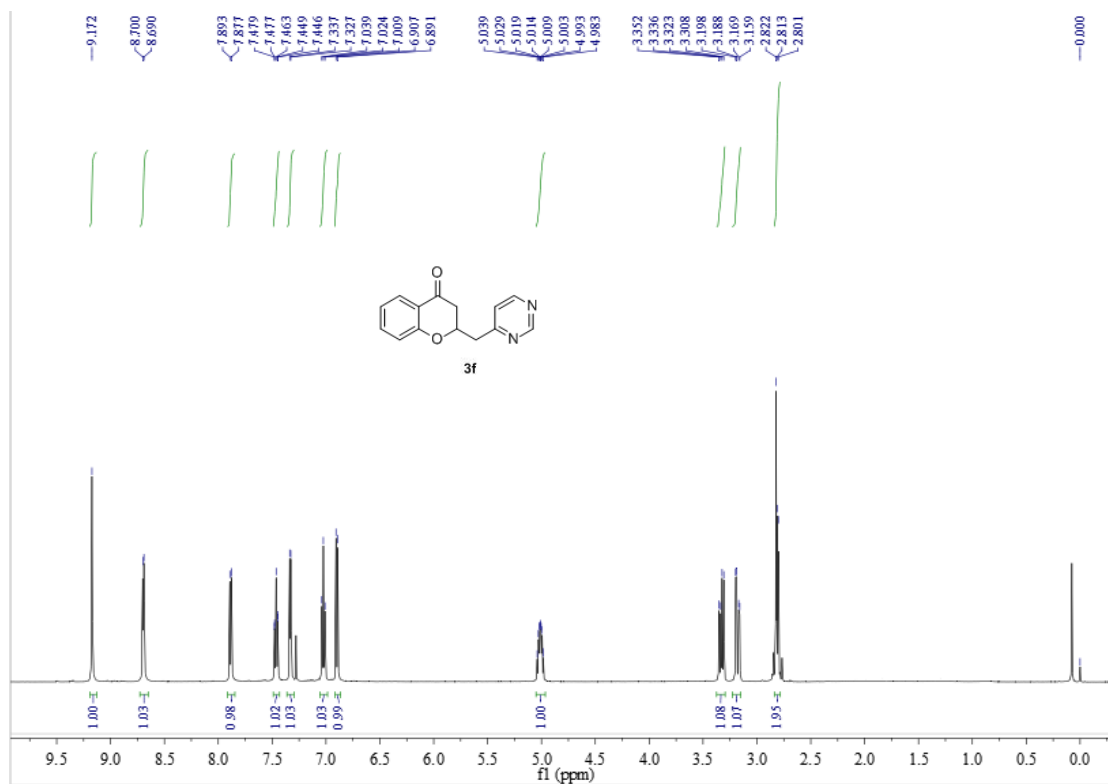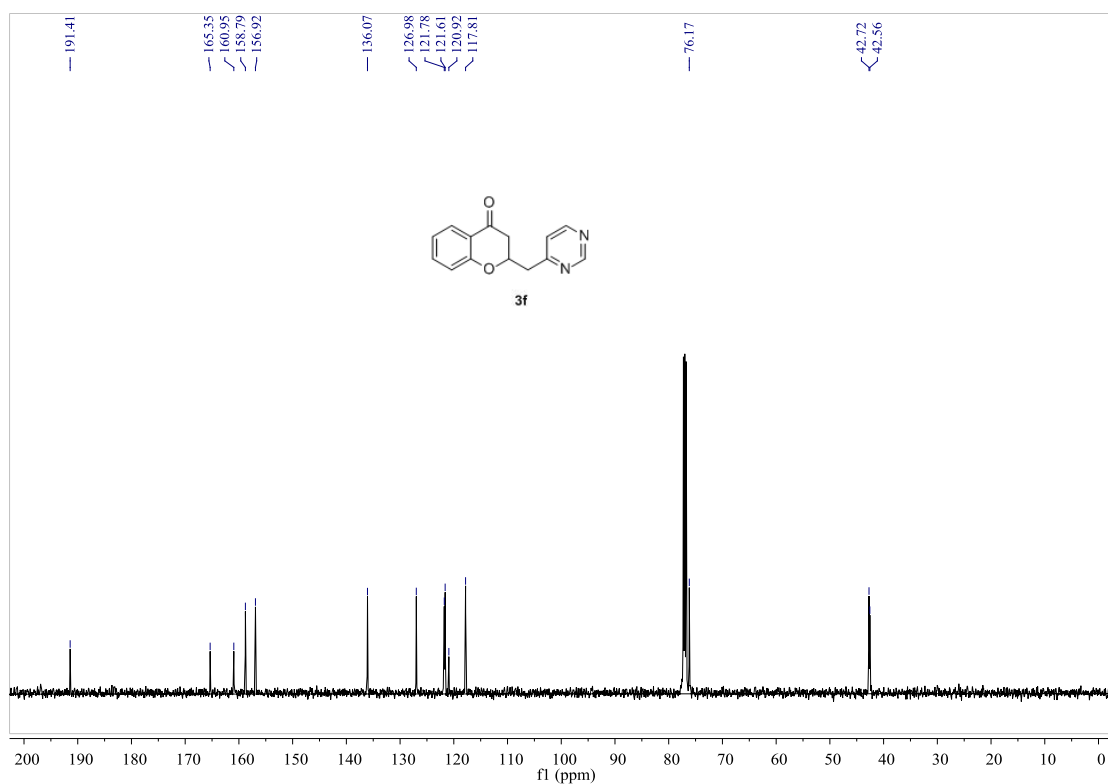

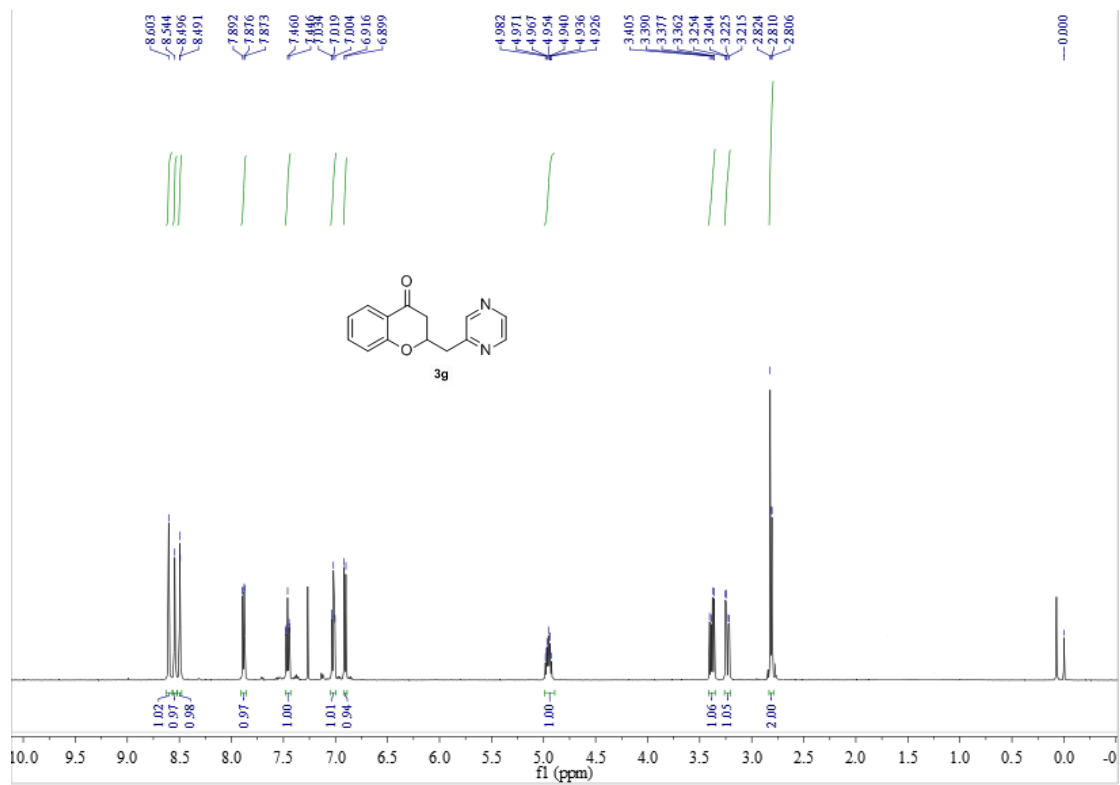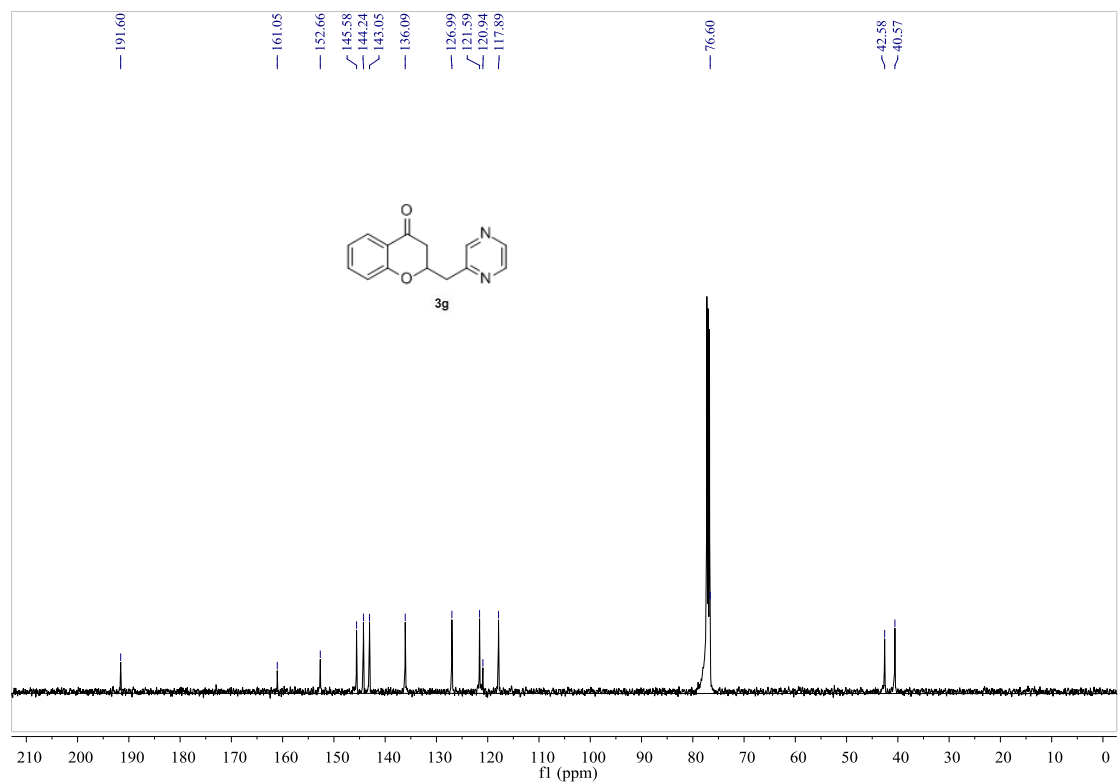

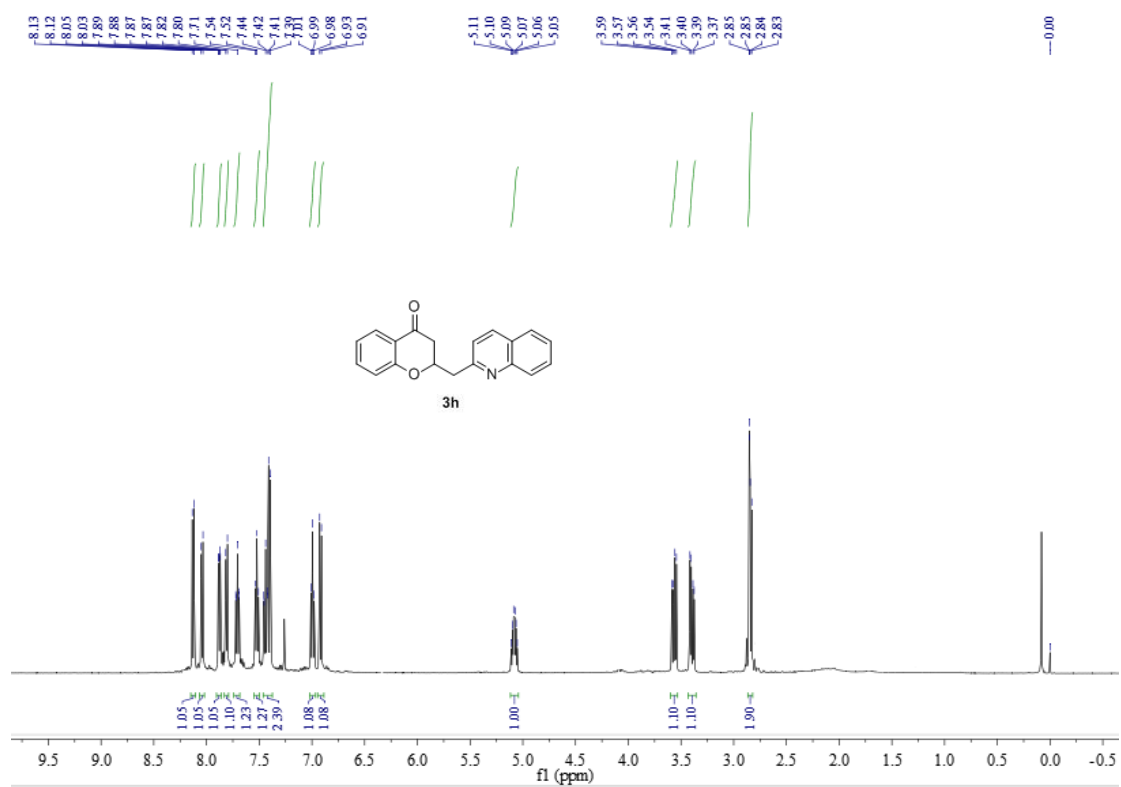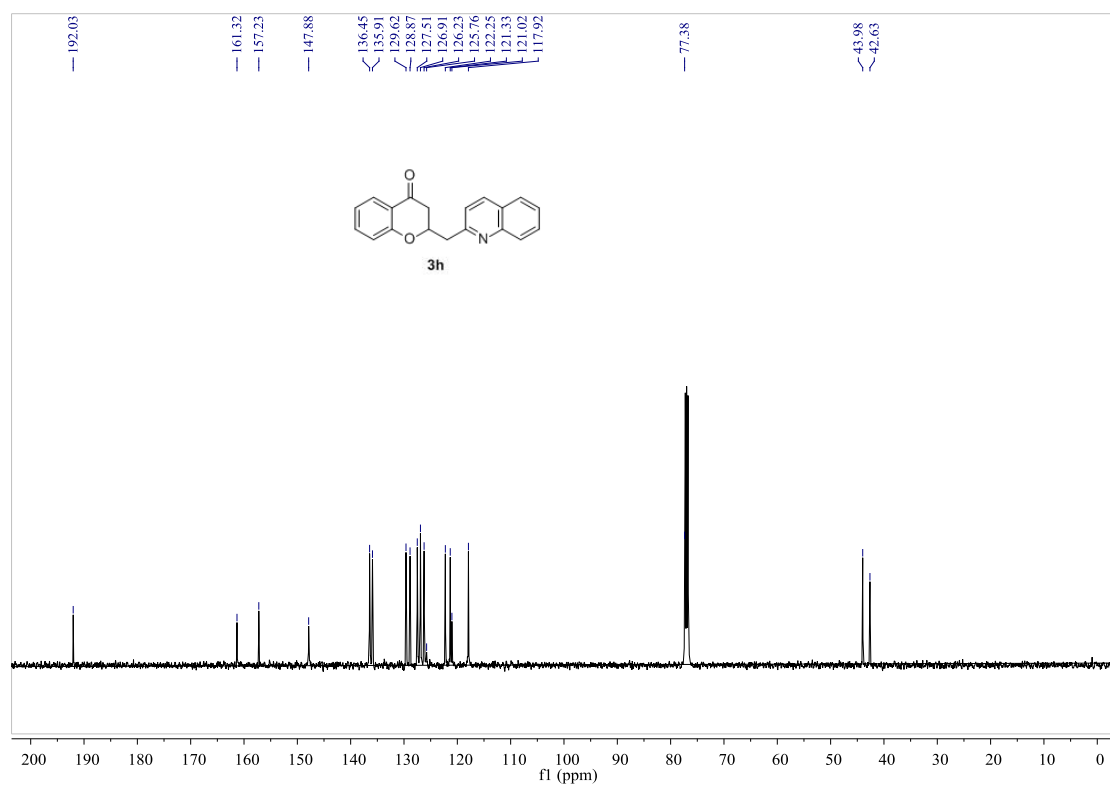



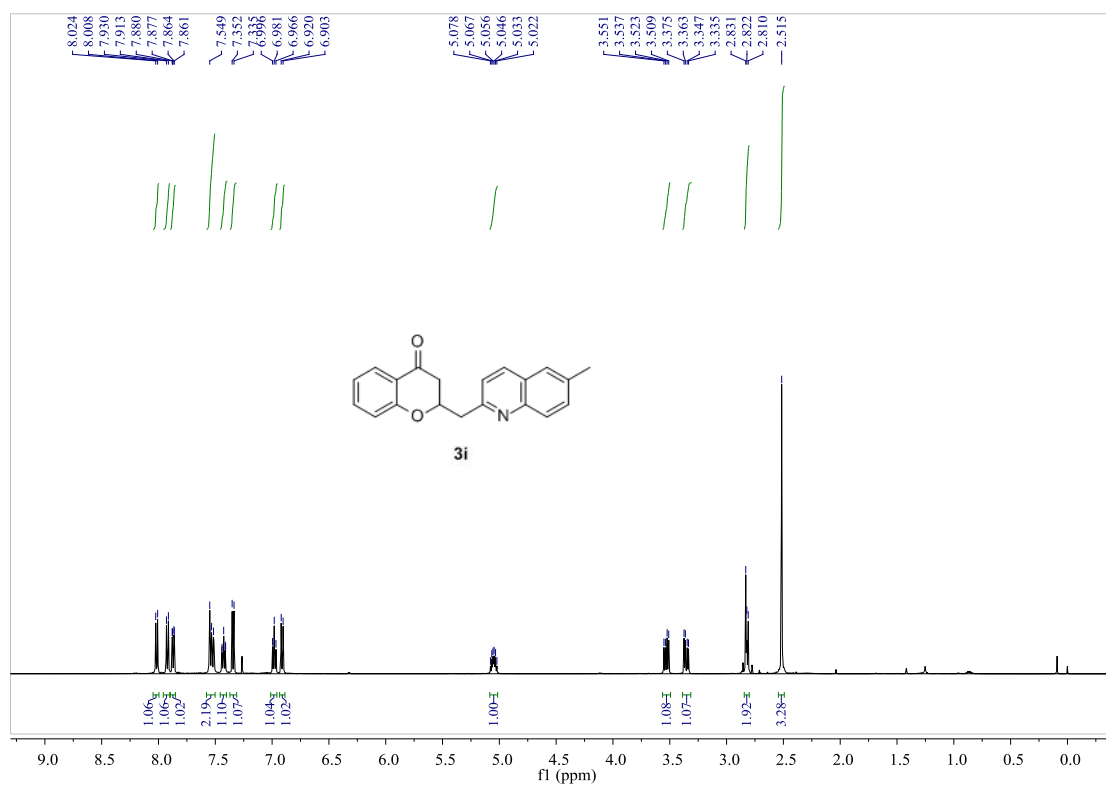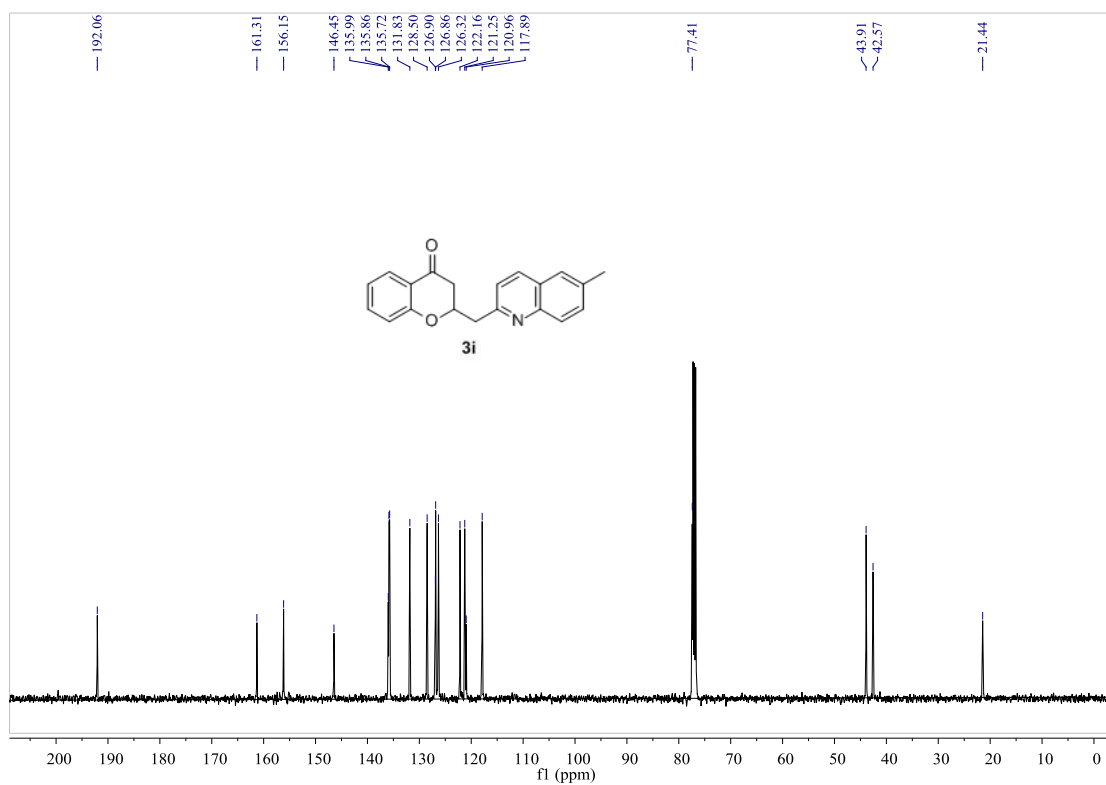

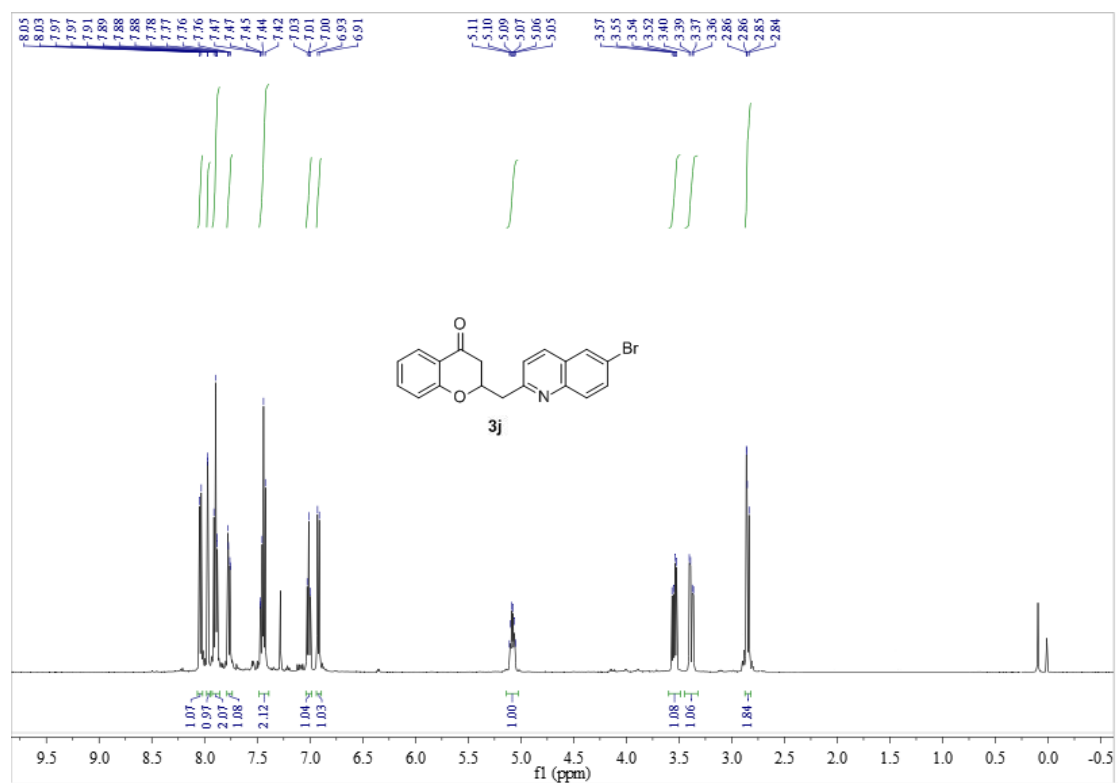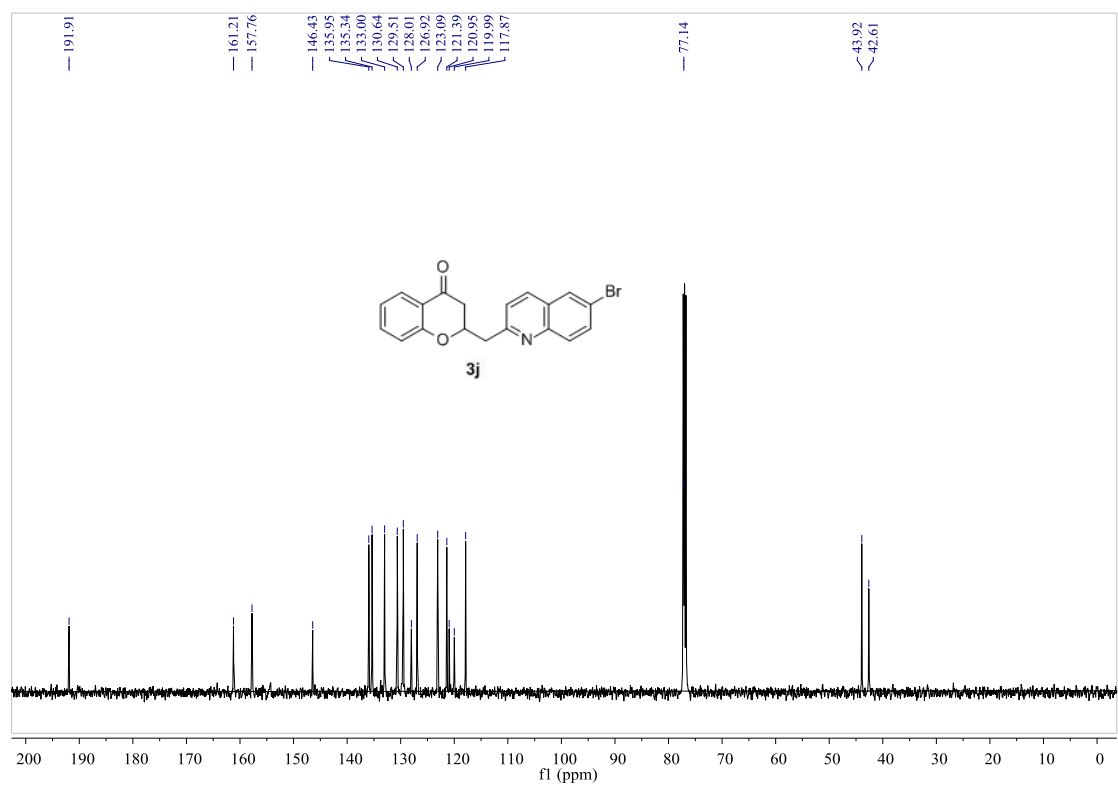

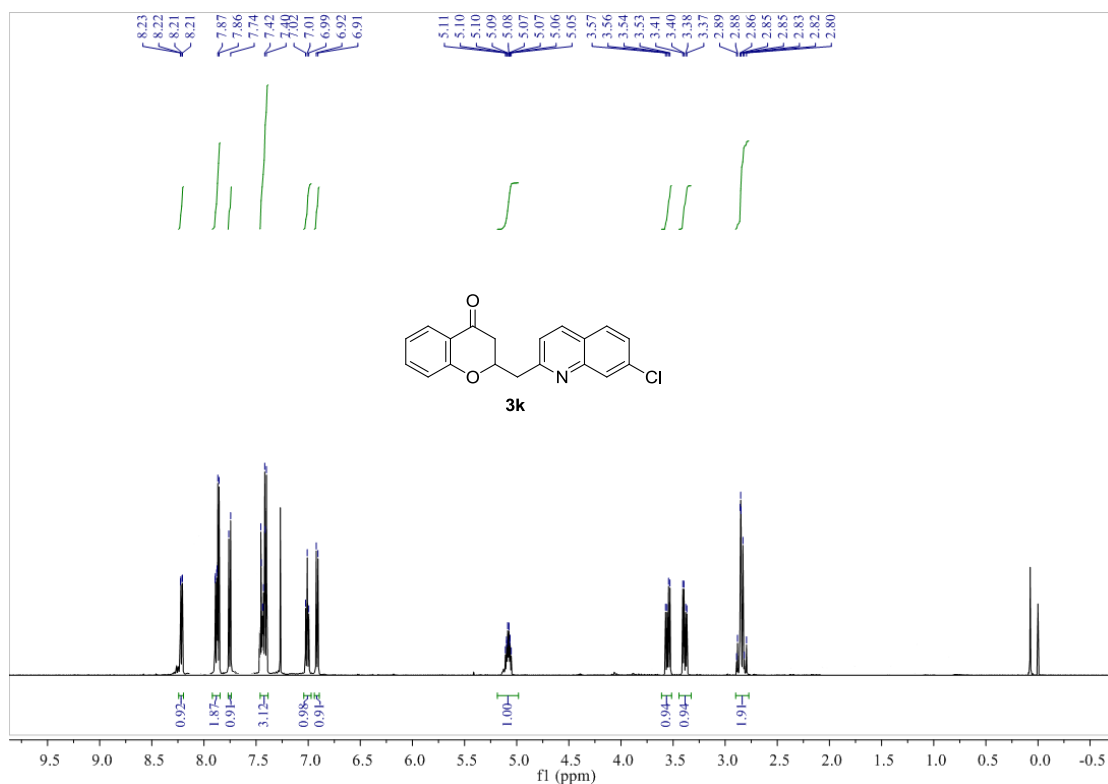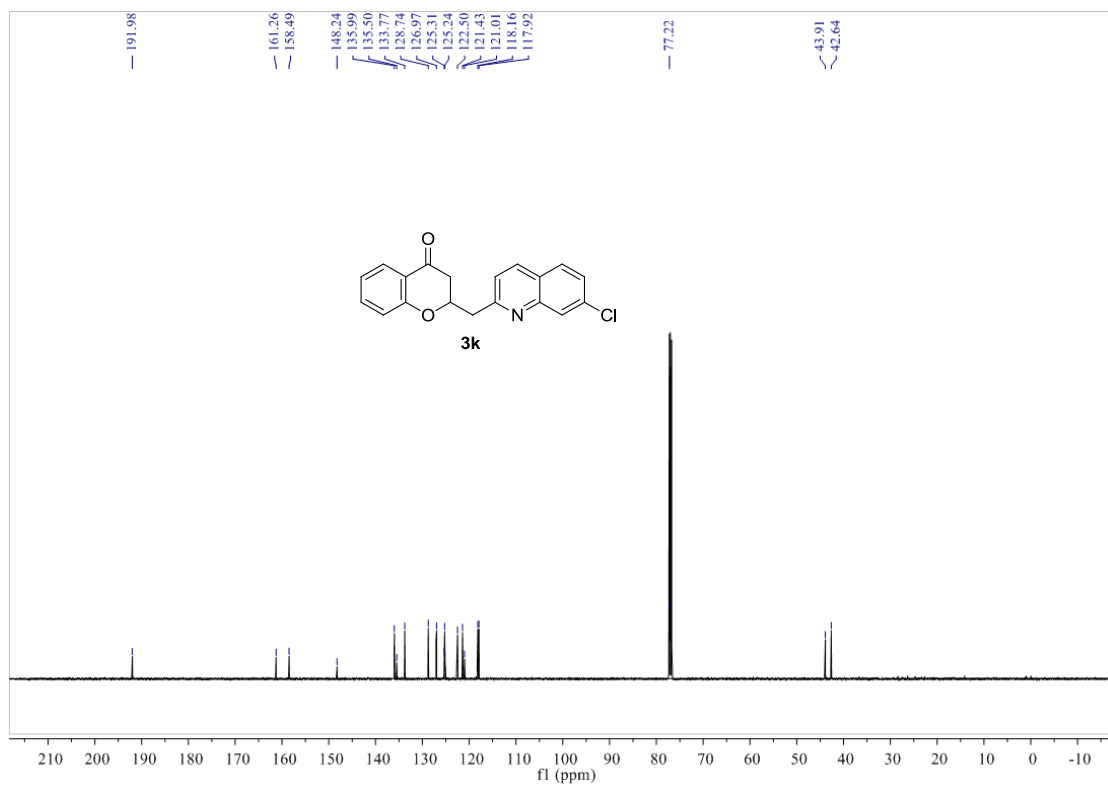

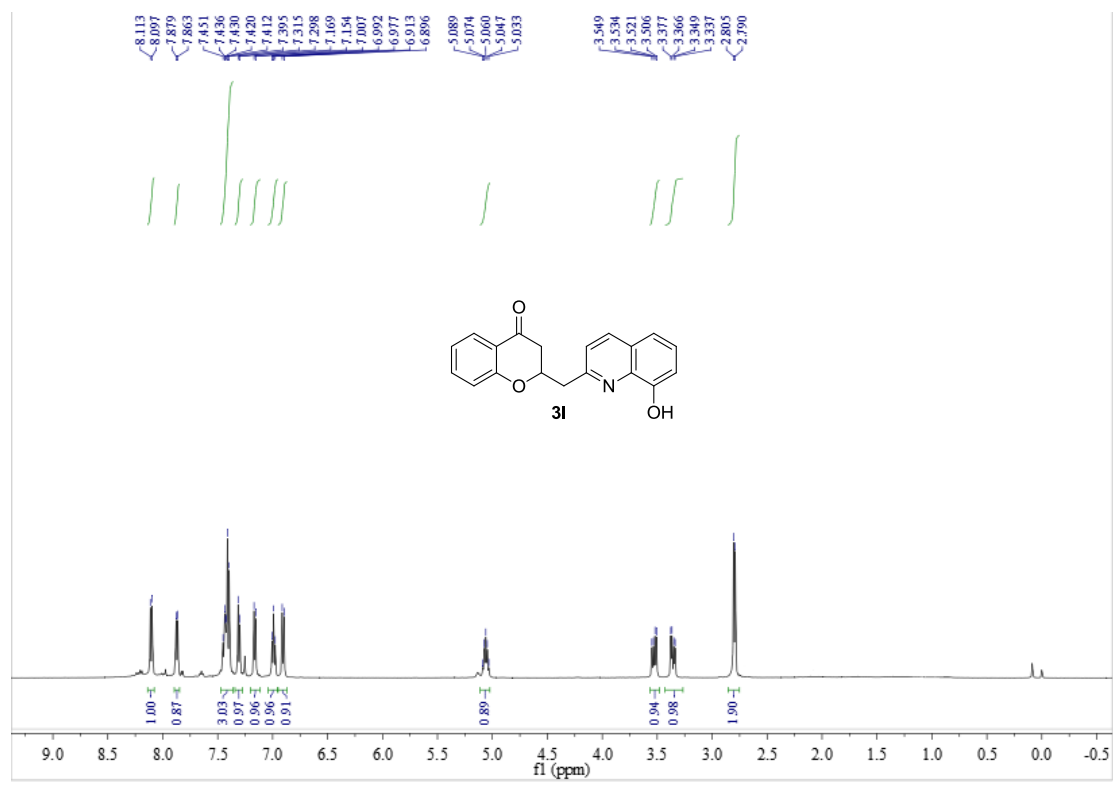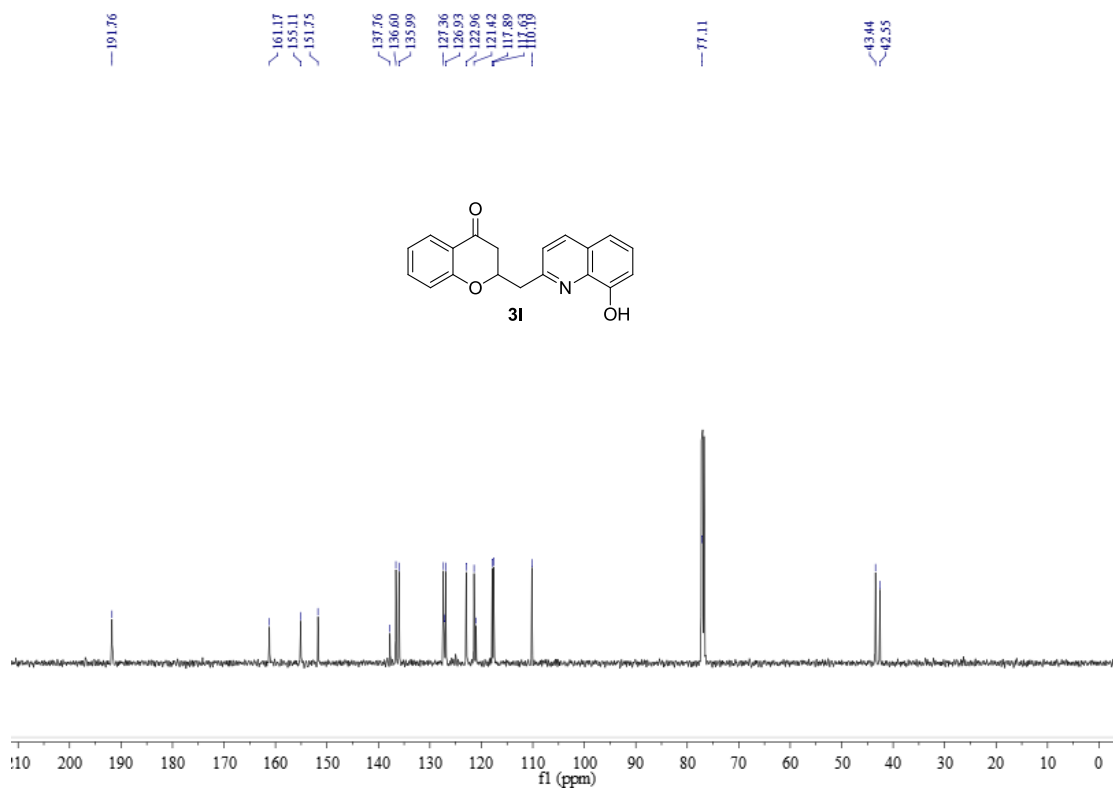

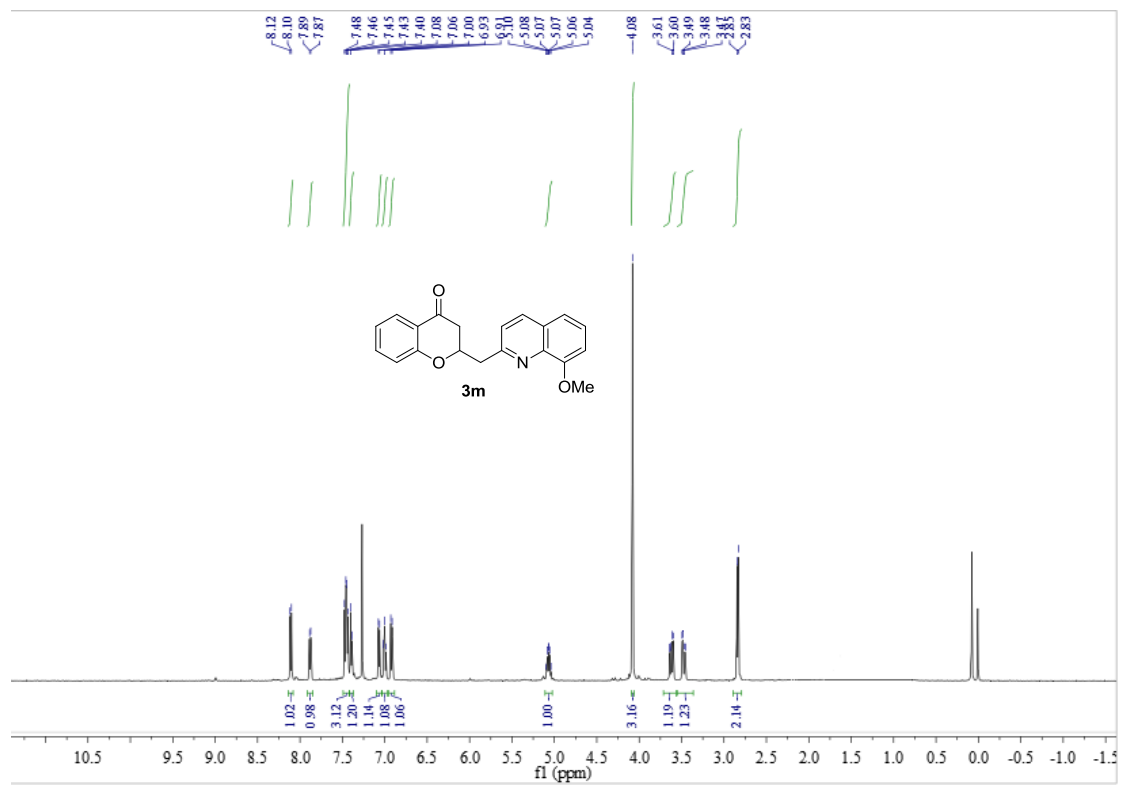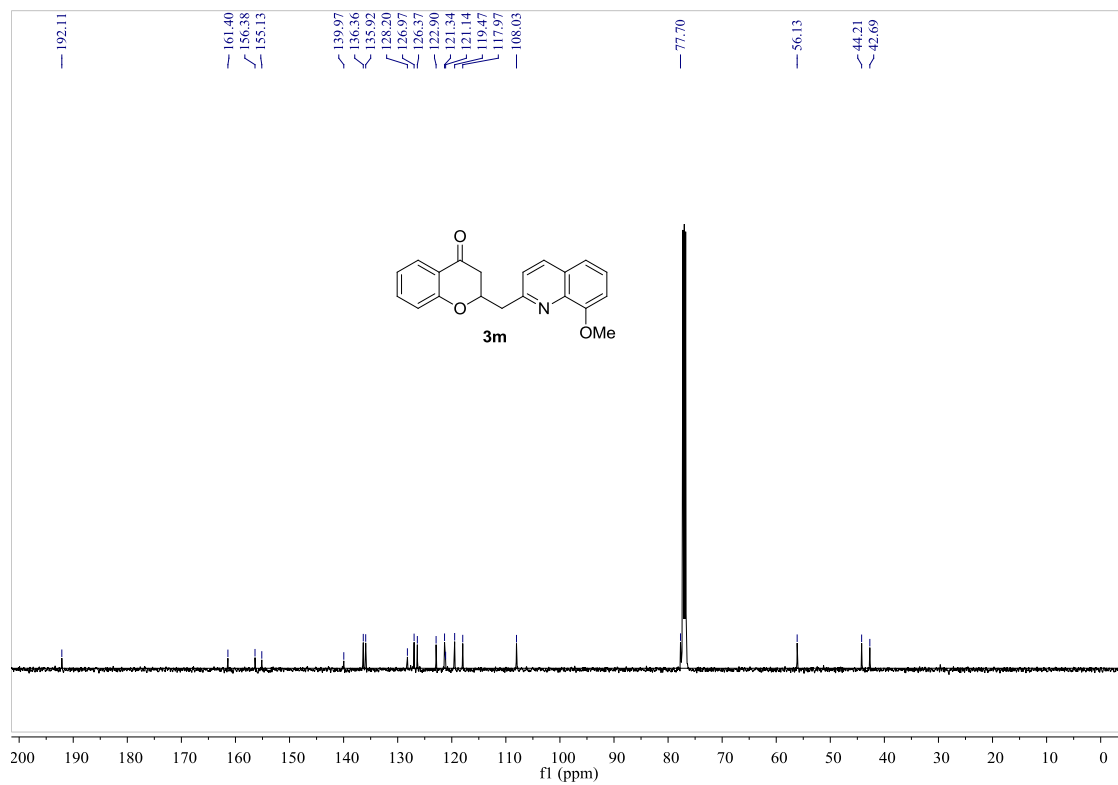

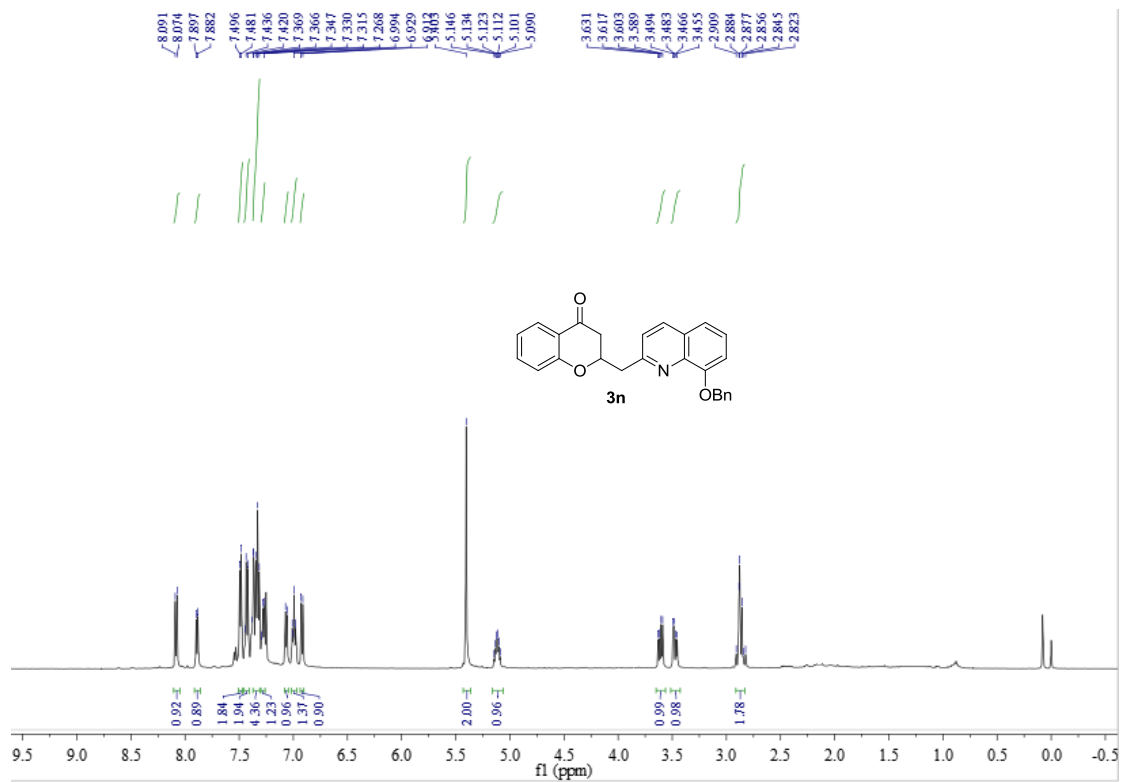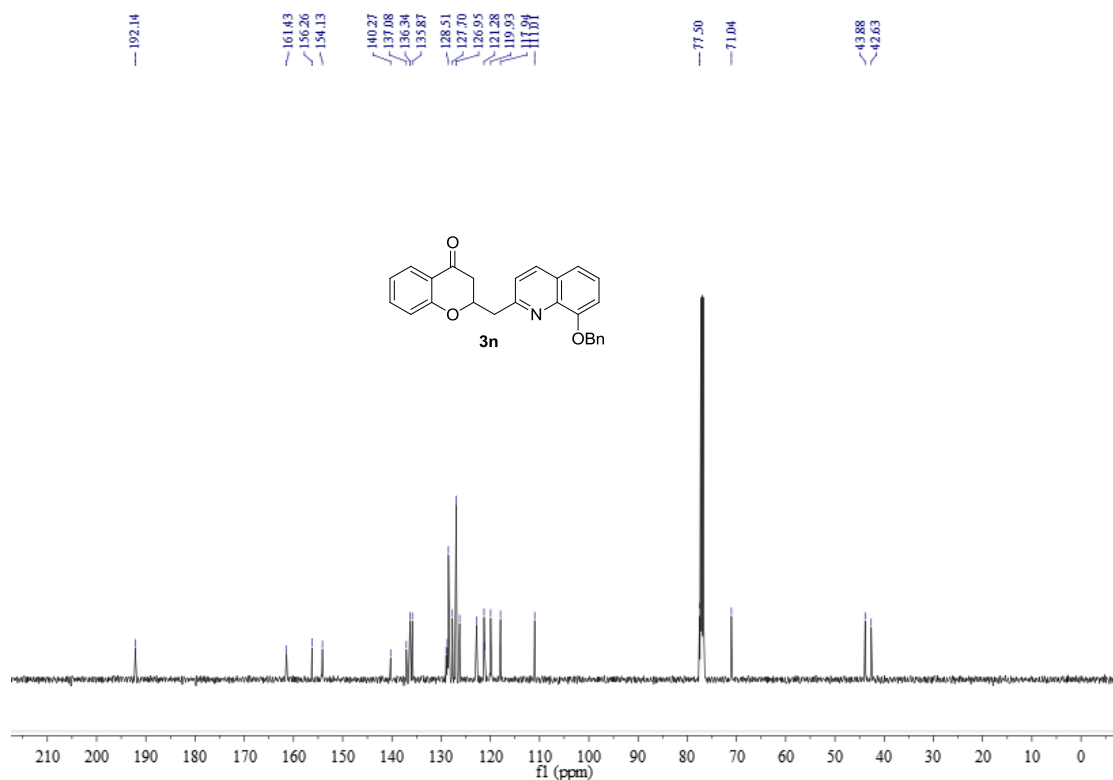

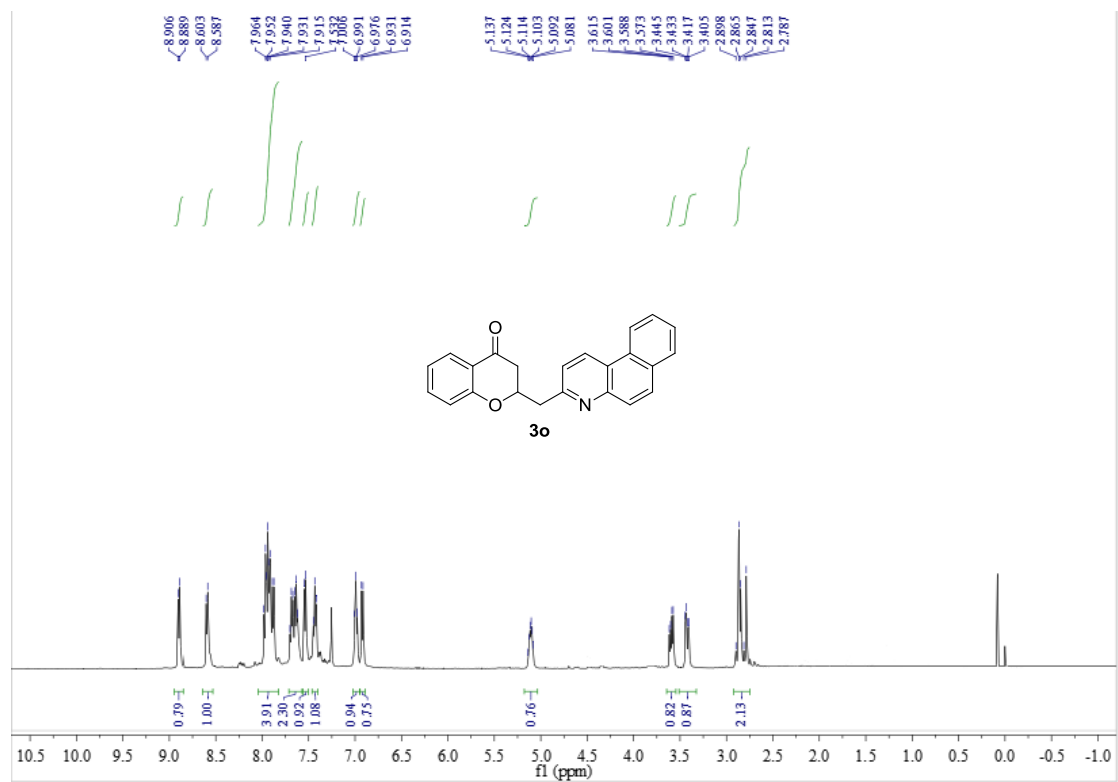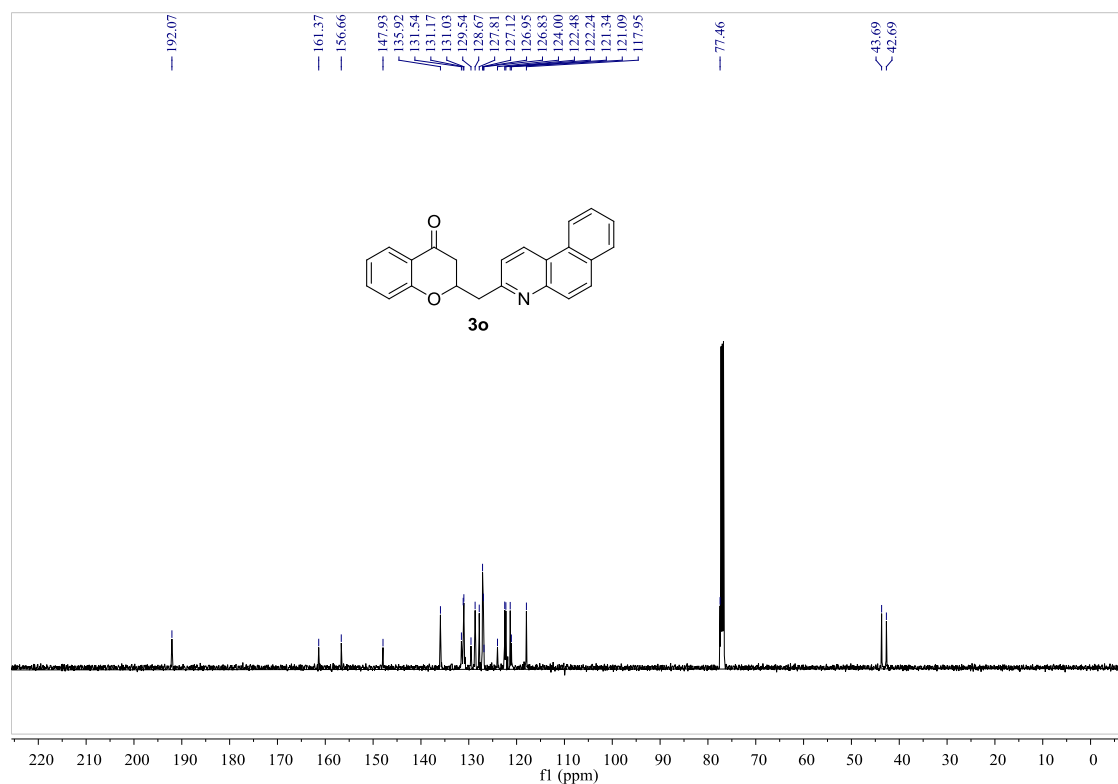

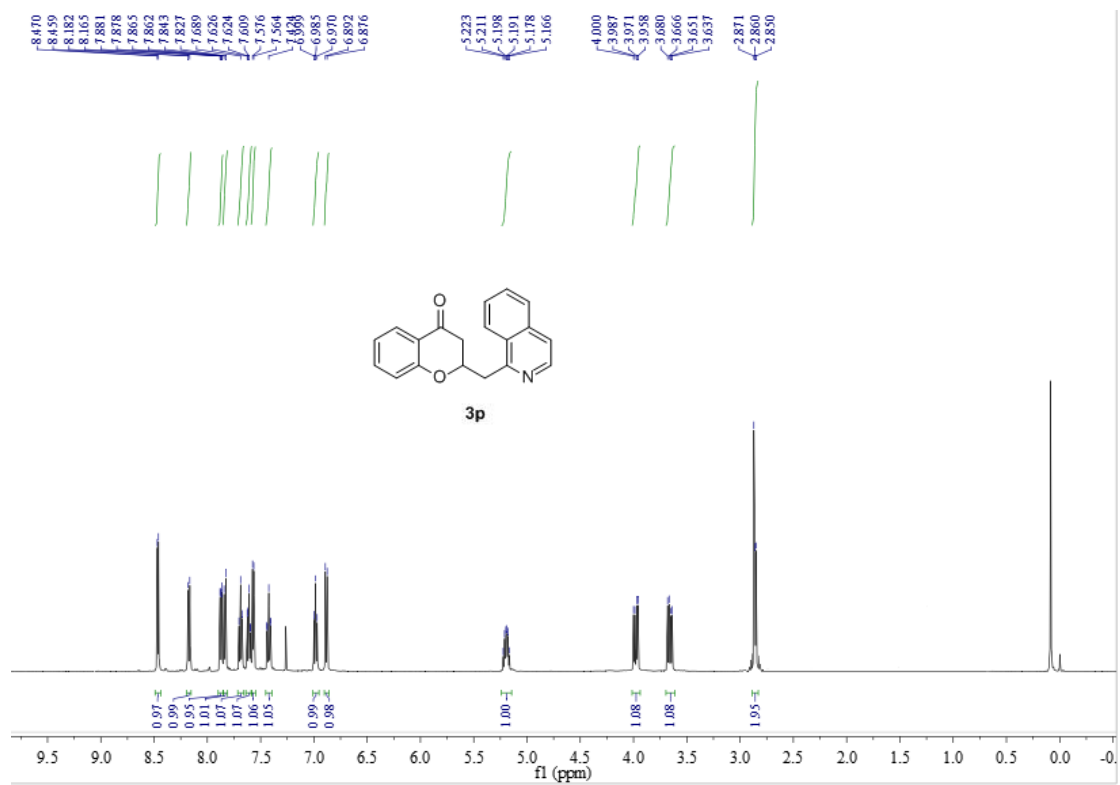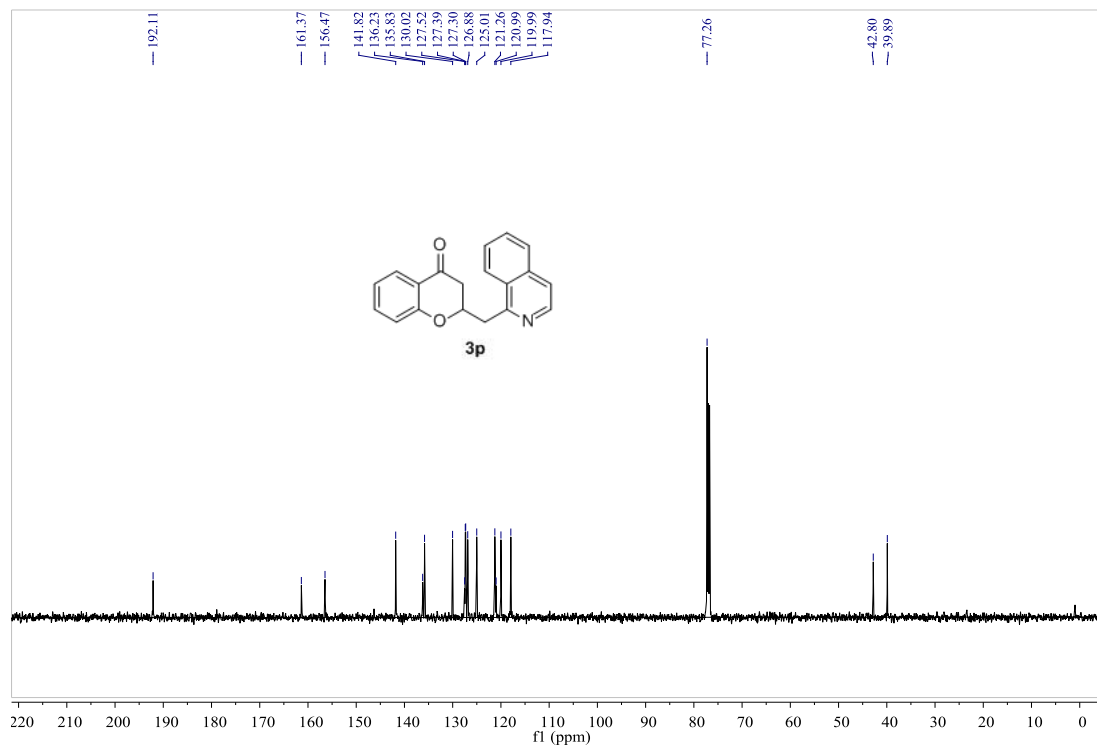



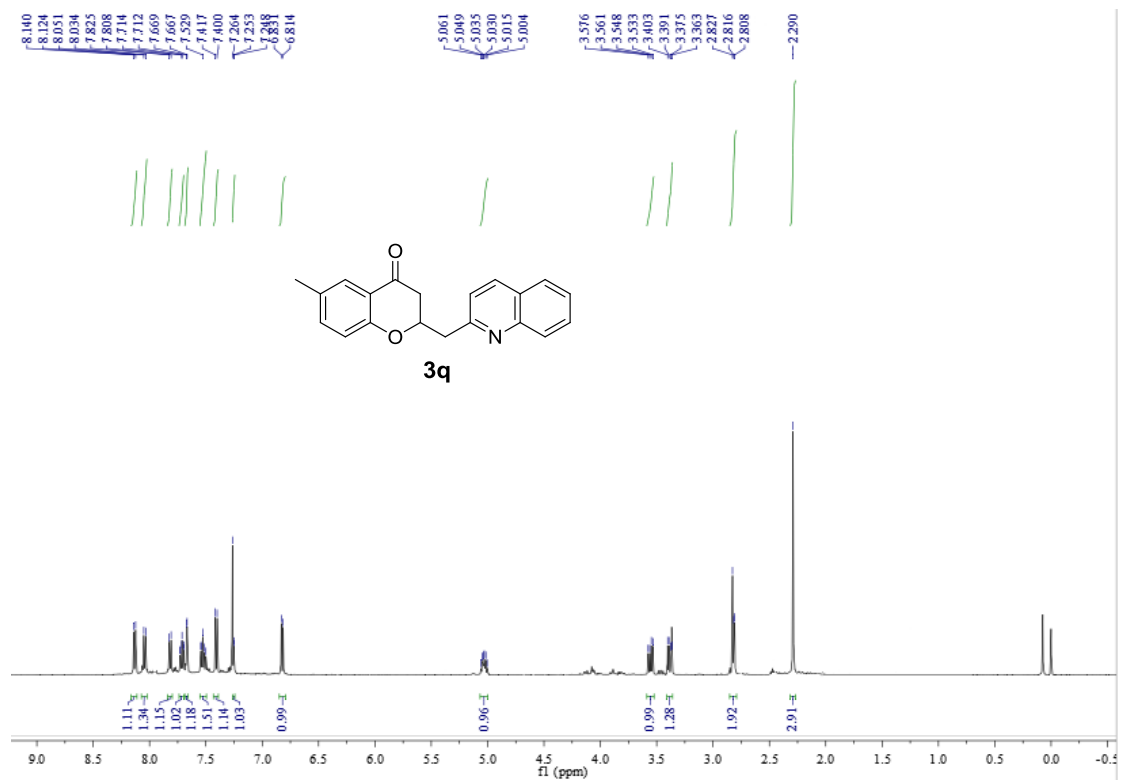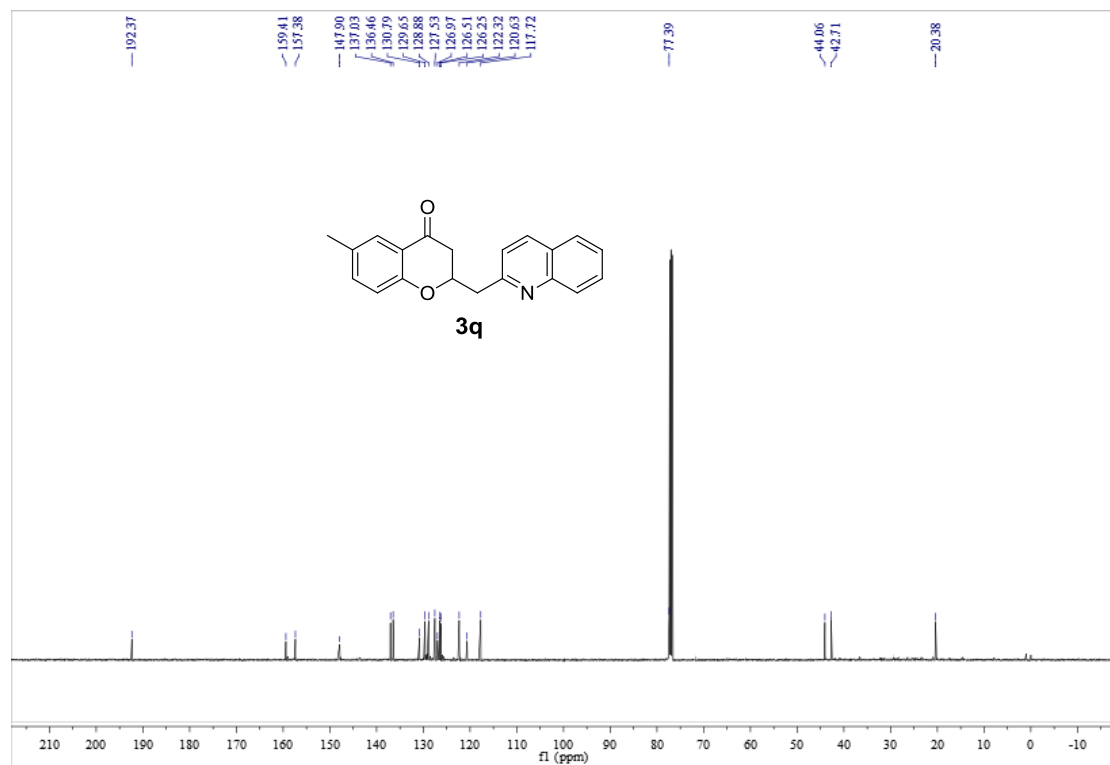

Supplement: c4ra09338k1.pdf [file c4ra09338k1.pdf]
